# Supplementary material for: The quality of medical products for cardiovascular diseases: a gap in global cardiac care
Source: PubMed Central journal article supplement (PMC8442059; doi:10.1136/bmjgh-2021-006523), 2021-09-14
Supplement: bmjgh-2021-006523supp002.pdf [file bmjgh-2021-006523supp002.pdf]

**Supplementary file 2. Websites used for information searching about substandard and falsified cardiovascular medicines and medical devices**

|                                                               | <b>Websites names and hyperlinks</b>                                                 |                                                            | <b>Websites names and hyperlinks</b>                                                |
|---------------------------------------------------------------|--------------------------------------------------------------------------------------|------------------------------------------------------------|-------------------------------------------------------------------------------------|
| <b>International Organisations and NGOs</b>                   | <a href="#">WHO-Essential Medicines and Health Products Information Portal</a>       | <b>Medicine Regulatory Authorities and national bodies</b> | <a href="#">Ghana Food and Drugs Authorities</a>                                    |
|                                                               | <a href="#">WHO Prequalification Programme</a>                                       |                                                            | <a href="#">Kenya Pharmacy and Poisons Board</a>                                    |
|                                                               | <a href="#">USP Promoting the Quality of Medicines</a>                               |                                                            | <a href="#">Hong Kong Government</a>                                                |
|                                                               | <a href="#">Safe Medicines India</a>                                                 |                                                            | <a href="#">NAFDAC Nigeria</a>                                                      |
|                                                               | <a href="#">MIMS thailand</a>                                                        |                                                            | <a href="#">Danish medicines agency</a>                                             |
|                                                               | <a href="#">Office des nations unies contre la drogue et le crime</a>                |                                                            | <a href="#">Thailand Food and Drugs Administration</a>                              |
|                                                               | <a href="#">ReMeD-Réseau Médicaments et Développement</a>                            |                                                            | <a href="#">Agence Nationale de Sécurité du Médicament et des Produits de Santé</a> |
|                                                               | <a href="#">Medical Products Counterfeiting and Pharmaceutical Crime ( INTERPOL)</a> |                                                            | <a href="#">Medicines and Healthcare products Regulatory Agency, UK Government</a>  |
|                                                               | <a href="#">ACG - Anti-counterfeting group</a>                                       |                                                            | <a href="#">US Food and Drug Administration</a>                                     |
|                                                               | <a href="#">Permanent Forum on International Pharmaceutical Crime</a>                |                                                            | <a href="#">Government of Canada</a>                                                |
|                                                               | <a href="#">Medicines Transparency Alliance- Health Action International</a>         |                                                            | <a href="#">Central Drugs Standard Control Organization</a>                         |
|                                                               | <a href="#">Médecins Sans Frontières Access Campaign</a>                             |                                                            | <a href="#">Ordre national des pharmaciens de côte d'ivoire</a>                     |
|                                                               | <a href="#">Third World Network</a>                                                  |                                                            | <a href="#">Campaign for Safe Medicines in Kenya</a>                                |
|                                                               | <a href="#">Council of Europe-Medicrime convention</a>                               |                                                            | <a href="#">Sproxil Brand Protection &amp; Mobile Sales Enablement Solution</a>     |
|                                                               | <a href="#">EAASM-European Alliance for Access to Safe Medicines</a>                 |                                                            | <a href="#">Association Développement et Santé Contrefaçon Riposte</a>              |
|                                                               | <a href="#">GACG Global Anti-Counterfeiting Network</a>                              |                                                            | <a href="#">Mpedigree - Bringing Quality To Life</a>                                |
|                                                               | <a href="#">IRACM Institute of Research Against Counterfeit Medicines</a>            |                                                            | <a href="#">Partnership for safe medicines</a>                                      |
|                                                               | <a href="#">The Global Pharma Health Fund</a>                                        |                                                            | <a href="#">Pharmabiz</a>                                                           |
| <a href="#">Fondation Chirac - Agir au service de la paix</a> | <a href="#">PharmaSecure</a>                                                         |                                                            |                                                                                     |
| <b>Academic/ Research Initiatives</b>                         | <a href="#">QUAMED - Quality Medicines for All</a>                                   | <b>Newspaper websites with</b>                             | <a href="#">www.ghanaweb.com</a>                                                    |
|                                                               | <a href="#">IRASEC- Institut de Recherche sur l'Asie du Sud-Est Contemporaine</a>    |                                                            | <a href="https://www.modernghana.com/">https://www.modernghana.com/</a>             |
|                                                               | <a href="#">Pharmelp Detection of counterfeit medicines</a>                          |                                                            |                                                                                     |
|                                                               |                                                                                      |                                                            |                                                                                     |

|                                |                                                       |                                             |                                                                               |
|--------------------------------|-------------------------------------------------------|---------------------------------------------|-------------------------------------------------------------------------------|
|                                | <a href="#">The pharmaceutical security institute</a> | <b>interest in<br/>medicine<br/>quality</b> | <a href="https://www.thehansindia.com/">https://www.thehansindia.com/</a>     |
| <b>Pharmaceutical Industry</b> | <a href="#">Securing Pharma</a>                       |                                             | <a href="https://www.chiangraitimes.com/">https://www.chiangraitimes.com/</a> |
|                                | <a href="#">Reconnaissance international</a>          |                                             | <a href="https://www.monitor.co.ug/">https://www.monitor.co.ug/</a>           |
|                                | <a href="#">Pfizer Pharmaceutical News</a>            |                                             |                                                                               |
|                                | <a href="#">Sanofi</a>                                |                                             |                                                                               |
