# Supplementary material for: The quality of medical products for cardiovascular diseases: a gap in global cardiac care
Source: PubMed Central journal article supplement (PMC8442059; doi:10.1136/bmjgh-2021-006523), 2021-09-14
Supplement: bmjgh-2021-006523supp004.pdf [file bmjgh-2021-006523supp004.pdf]

| <b>Supplementary file 4 : Number of publication, data points and samples per study/report type in publications containing description of the quality of cardiovascular medicines in data point(s), i.e. in a specific location at a specific time</b> |                                  |                                   |                                  |                              |
|-------------------------------------------------------------------------------------------------------------------------------------------------------------------------------------------------------------------------------------------------------|----------------------------------|-----------------------------------|----------------------------------|------------------------------|
|                                                                                                                                                                                                                                                       | <b>Study type</b>                | <b>No. publications<br/>n (%)</b> | <b>No. data<br/>points n (%)</b> | <b>No. samples<br/>n (%)</b> |
| <b>Scientific reports</b>                                                                                                                                                                                                                             | <b>Equivalence study</b>         | 116 (48.1%)                       | 161 (33.0%)                      | 822 (17.5%)                  |
|                                                                                                                                                                                                                                                       | <b>Prevalence survey</b>         | 27 (11.2%)                        | 131 (26.8%)                      | 3,414 (72.6%)                |
|                                                                                                                                                                                                                                                       | <b>Control quality - routine</b> | 14 (5.8%)                         | 51 (10.5%)                       | 443 (9.4%)                   |
|                                                                                                                                                                                                                                                       | <b>Stability study</b>           | 5 (2.1%)                          | 6 (1.2%)                         | 18 (0.4%)                    |
|                                                                                                                                                                                                                                                       | <b>Bioavailability studies</b>   | 2 (0.8%)                          | 2 (0.4%)                         | 6 (0.1%)                     |
|                                                                                                                                                                                                                                                       | <b>Total</b>                     | <b>164 (68.0%)</b>                | <b>351 (72.1%)</b>               | <b>4,703 (100.0%)</b>        |
| <b>Other reports</b>                                                                                                                                                                                                                                  | <b>Recall/warning/alert</b>      | 65 (27.0%)                        | 124 (25.4%)                      |                              |
|                                                                                                                                                                                                                                                       | <b>Case reports</b>              | 6 (2.5%)                          | 6 (1.2%)                         |                              |
|                                                                                                                                                                                                                                                       | <b>Seizure</b>                   | 6 (2.5%)                          | 7 (1.4%)                         |                              |
|                                                                                                                                                                                                                                                       | <b>Total</b>                     | <b>77 (32.0%)</b>                 | <b>137 (28.1%)</b>               |                              |
| <b>Total</b>                                                                                                                                                                                                                                          |                                  | <b>241 (100.0%)</b>               | <b>488 (100.0%)</b>              |                              |
