# Supplementary material for: The quality of medical products for cardiovascular diseases: a gap in global cardiac care
Source: PubMed Central journal article supplement (PMC8442059; doi:10.1136/bmjgh-2021-006523), 2021-09-14
Supplement: bmjgh-2021-006523supp005.pdf [file bmjgh-2021-006523supp005.pdf]

## Supplementary file 5. Main characteristics of prevalence surveys of cardiovascular medicines

| Reference country / of collection                                                                                                                                                              | Active pharmaceutical ingredient (API) | Brand name               | Outlet/ Sampling type                                           | Reference specifications standard                                       | Test (s) performed and analytical technique                                                                                                                           | No. Failed n/N(%) |
|------------------------------------------------------------------------------------------------------------------------------------------------------------------------------------------------|----------------------------------------|--------------------------|-----------------------------------------------------------------|-------------------------------------------------------------------------|-----------------------------------------------------------------------------------------------------------------------------------------------------------------------|-------------------|
| Nazerali, 1996 [1] Zimbabwe                                                                                                                                                                    | Epinephrine                            | Unknown                  | Public medical stores, hospital and health centres/ Convenience | USP 1990                                                                | API content<br><i>HPLC</i>                                                                                                                                            | 2 /11(18.2%)      |
| Westenberger, 2005 [2] Unstated country                                                                                                                                                        | Warfarin                               | Unknown                  | Website/ Convenience                                            | USP 26/ 2003                                                            | API content, API Identification, Dissolution, Impurity, Weight variation, Visual inspection<br><i>HPLC, Near-infrared spectroscopy (NIR), Thermogravimetric (TGA)</i> | 0 /4(0%)          |
| Schwertner, 2005 [3] Mexico                                                                                                                                                                    | Digoxin                                | Lanoxin                  | Pharmacies/ Convenience                                         | USP                                                                     | API content<br><i>HPLC-DAD</i>                                                                                                                                        | 0/2 (0%)          |
| Sheth, 2007 [4] India                                                                                                                                                                          | Ramipril<br>Atenolol<br>Diltiazem      | Unknown                  | Retail pharmacy (licenced) / Convenience                        | ' Conduct of analysis as per Pharmacopoeial status mentioned on label.' | API content<br><i>Method Unstated</i>                                                                                                                                 | 0/86 (0.0%)       |
| Qureshi, 2008 [5] Argentina, Austria, Brazil, Canada, China, Cyprus, Denmark, Egypt, Finland, France, Germany, Greece, Hungary, Luxembourg, Mexico, Netherlands, New Zealand, Poland, Portugal | Furosemide                             | Lasix and other products | Different outlets (retail pharmacy, wholesaler)/ Convenience    | BP<br>USP 22<br>European Pharmacopoeia                                  | API content, Content uniformity, Disintegration, Dissolution, Mass uniformity<br><i>HPLC-UV<br/>IR spectrophotometry</i>                                              | 3/196 (1.5%)      |

| Reference country / of collection | Active pharmaceutical ingredient (API)                                    | Brand name                                                                                                                                                                                         | Outlet/ Sampling type                               | Reference specifications standard | Test (s) performed and analytical technique                                                                                      | No. Failed n/N(%) |
|-----------------------------------|---------------------------------------------------------------------------|----------------------------------------------------------------------------------------------------------------------------------------------------------------------------------------------------|-----------------------------------------------------|-----------------------------------|----------------------------------------------------------------------------------------------------------------------------------|-------------------|
| CDSCO, 2009 [6] India             | Amlodipine, Atenolol, Atorvastatin                                        | Amdepine<br>Amlopress<br>Amlosafe<br>Aten-50<br>Atherochek10<br>Storvas-10<br>Tenolol<br>Ziblok<br>Zivast-10                                                                                       | Hospital/health centers                             | Indian Pharmacopeia               | API content, Api Identification, Visual inspection<br><br><i>Method Unstated</i>                                                 | 3/435 (0.7%)      |
| Twagirumukiza, 2009 [7] Rwanda    | Atenolol<br>Captopril<br>Hydrochlorothiazide<br>Methyldopa<br>Propranolol | Tenormin,<br>Betanorm<br>Catenol<br>Capoten<br>Captopril Denk,<br>Cetopril<br>Esidrex,<br>HCTZ L&A,<br>HCTZ Cipla<br>Aldomet Belgium<br>Methyldopa L&A<br>Aldomet Pakistan<br>Inderal<br>Cepanolol | Public and official private pharmacies/ Convenience | USP 2006                          | API content, Dissolution<br><br><i>HPLC-UV/Vis</i><br><i>UV-visible spectrophotometry</i>                                        | 2 /16(12.5%)      |
| Markman, 2009 [8] Brazil          | Simvastatin                                                               | Unknown                                                                                                                                                                                            | Compounding pharmacies/ Convenience                 | Brazilian Pharmacopeia, USP 2008  | API content, Content uniformity, Dissolution, weight<br><br><i>HPLC-UV/Vis</i>                                                   | 16/18 (88.9%)     |
| Bate, 2010 [9] United States      | Atorvastatin                                                              | Lipitor                                                                                                                                                                                            | Website/ Convenience                                | Not applicable                    | API content<br><br><i>Raman Spectroscopy</i>                                                                                     | 0/25 (0.0%)       |
| Luciane O. Lima, 2011 [10] Brazil | Methyldopa<br>Enalapril<br>Propranolol<br>Furosemide                      | Unknown                                                                                                                                                                                            | Pharmacy/ Convenience                               | Brazilian Pharmacopeia            | API content, content uniformity, weight, dissolution<br><br><i>UV-visible spectrophotometry</i>                                  | 3/9 (33.3%)       |
| Marques-Marinho, 2011 [11] Brazil | Simvastatin                                                               | Unknown                                                                                                                                                                                            | Compounding pharmacies/ Convenience                 | Brazilian Pharmacopeia, USP 2009  | API content, Content uniformity, Disintegration, Dissolution, Friability, Hardness, Mass uniformity<br><br><i>RP-HPLC-UV/DAD</i> | 16 /30 (53.3%)    |

| Reference country / of collection                                                                       | Active pharmaceutical ingredient (API)                                                                   | Brand name                                                                                                  | Outlet/ Sampling type                                                     | Reference specifications standard   | Test (s) performed and analytical technique                                                                                 | No. Failed n/N(%) |
|---------------------------------------------------------------------------------------------------------|----------------------------------------------------------------------------------------------------------|-------------------------------------------------------------------------------------------------------------|---------------------------------------------------------------------------|-------------------------------------|-----------------------------------------------------------------------------------------------------------------------------|-------------------|
| Yusuf, Inua, 2011 [12]<br>Afghanistan                                                                   | Atenolol                                                                                                 | Unknown                                                                                                     | Public and private pharmacy/<br>Convenience                               | United States Pharmacopeia          | API content, API identification, Dissolution<br><br><i>HPLC</i>                                                             | 3/30 (10.0%)      |
| Karlage, 2012 [13]<br>US, Mexico                                                                        | Warfarin                                                                                                 | Generic<br>Coumadin<br>Rofarmin                                                                             | Pharmacy /<br>Random                                                      | USP                                 | API content<br><br><i>HPLC-DAD</i>                                                                                          | 0/4 (0.0%)        |
| Patel, 2012 [14]<br><br>South Africa                                                                    | Hydrochlorothiazide (HCTZ)                                                                               | Adco-retic<br>HCTZ<br>Ridaq<br>Hexazide                                                                     | Public and private health sectors outlets-<br>unspecified/<br>Convenience | BP 2005, USP 2006                   | API identification, Dissolution test, Uniformity of weight<br><br><i>Fourier transformed infrared spectroscopy (FTIR)</i>   | 0/4 (0.0%)        |
| Kahsay, 2013 [15]<br>Belgium                                                                            | Clopidogrel-<br>Acetylsalicylic Acid                                                                     | Duoplavin<br>Coplavix<br>Clopitab<br>Clopilet<br>Plagril<br>Clavix<br>Noklot<br>Deplatt, Dospin<br>Antiplar | Unknown/Unkn<br>own                                                       | European Pharmacopoeia and USP 2010 | API content, impurity, dissolution, content uniformity<br><br><i>Liquid Chromatography (LC)-UV/Visible photodiode array</i> | 8 /10(80%)        |
| Al-Qatamin, 2014 [16]<br>Jordan                                                                         | Clopidogrel<br>Atorvastatin<br>Bisoprolol<br>Valsartan-HCTZ                                              | Plavix,<br>Lipitor<br>Concor<br>Co-diovan                                                                   | Pharmacies/<br>Random and convenience                                     | USP                                 | API content, Visual inspection, Impurity<br><br><i>HPLC-UV</i>                                                              | 0/172 (0%)        |
| Fukami, 2015 [17]<br>Japan                                                                              | Atorvastatin                                                                                             | Lipitor<br>Lipiget<br>Atorlip<br>Lipvas<br>Aztor                                                            | Website/<br>Convenience                                                   | Japanese Pharmacopeia               | API content, Visual inspection, Dissolution<br><br><i>HPLC</i>                                                              | 1/6 (16.7%)       |
| Macquart De Terline, 2016 [18]<br><i>Benin, Burkina Faso, Congo-Brazzaville, Côte D'Ivoire, Guinea,</i> | Acenocoumarol<br>Amlodipine<br>Atenolol<br>Captopril<br>Furosemide<br>Hydrochlorothiazide<br>Simvastatin | Unknown                                                                                                     | Private pharmacy and street market/<br>Random and Convenience             | In-house methods and specifications | API content<br><br><i>RP-HPLC-MS/MS</i>                                                                                     | 249/1530 (16.3%)  |

| Reference country / of collection                                                                    | Active pharmaceutical ingredient (API)                                   | Brand name                                                  | Outlet/ Sampling type                                          | Reference specifications standard                              | Test (s) performed and analytical technique                                                                                  | No. Failed n/N(%) |
|------------------------------------------------------------------------------------------------------|--------------------------------------------------------------------------|-------------------------------------------------------------|----------------------------------------------------------------|----------------------------------------------------------------|------------------------------------------------------------------------------------------------------------------------------|-------------------|
| <i>Mauritania, Niger, the Democratic Republic of the Congo, Senegal, and Togo</i>                    |                                                                          |                                                             |                                                                |                                                                |                                                                                                                              |                   |
| Petersen, 2017 [19] Cameroon, Democratic Republic of the Congo, Nigeria, Kenya, Uganda, Ghana, India | Captopril<br>Atenolol<br>Bisoprolol<br>Furosemide<br>Hydrochlorothiazide | Unknown                                                     | Private outlet (formal and informal drug vendors)/ Convenience | BP 2015                                                        | API content, API identification, Disintegration<br><br><i>Colorimetry, Thin Layer Chromatography (TLC)</i>                   | 1/50 (2.0%)       |
| Schafermann, 2018 [20] Togo                                                                          | Atenolol<br>Furosemide<br>Hydrochlorothiazide                            | Atenolol Denk<br>Furo Denk<br>Furosemide<br>Esidrex<br>HCTZ | Licensed pharmacy/ informal vendor/ Convenience                | USP 2016                                                       | API content, Visual inspection, Dissolution<br><br><i>HPLC-UV</i>                                                            | 1/24 (4.8%)       |
| Kakio, 2018 [21] China, Myanmar, Indonesia                                                           | Candesartan                                                              | Blopress<br>XINXIN<br>Candelong-8<br>Advant                 | Hospital/ Pharmacy/ Convenience                                | Japanese Pharmacopoeia                                         | API content, Visual inspection, Dissolution*<br><br><i>HPLC-UV</i>                                                           | 19/37 (51.4%)     |
| Ashames, 2019 [22] Libya                                                                             | Atenolol<br>Furosemide                                                   | Unknown                                                     | Local pharmacies/ Convenience                                  | BP 2015                                                        | API Content, Weight uniformity, Hardness, Friability, Disintegration, Dissolution<br><br><i>UV/Visible spectrophotometer</i> | 0/9 (0%)          |
| Ndichu, 2019 [23] Nigeria                                                                            | Nifedipine                                                               | Unknown                                                     | Registered pharmacies/ Random                                  | International Pharmacopoeia, USP, Food and Drug Administration | API content, Visual inspection, Impurity<br><br><i>HPLC-MS</i>                                                               | 78/102 (76.5%)    |
| Julie Redfern, 2019 [24] Nigeria                                                                     | Amlodipine<br>Lisinopril                                                 | Unknown                                                     | Private pharmacies/ Random                                     | United States Pharmacopoeia                                    | API content, Visual inspection<br><br><i>HPLC-PDA</i>                                                                        | 101/361 (28.0%)   |
| Rahman, M.S, 2019 [25]                                                                               | Amlodipine                                                               | Unknown                                                     | Pharmacy, Depot/                                               | British Pharmacopoeia,                                         | API content, Content uniformity, Dissolution                                                                                 | 7/79 (8.9%)       |

| Reference country / of collection                                                                                                                                                                                                                                                                                                                                                                                                                                                                                                                                                                                                                                       | Active pharmaceutical ingredient (API) | Brand name | Outlet/ Sampling type                               | Reference specifications standard                                                                        | Test (s) performed and analytical technique                                                                     | No. Failed n/N(%) |
|-------------------------------------------------------------------------------------------------------------------------------------------------------------------------------------------------------------------------------------------------------------------------------------------------------------------------------------------------------------------------------------------------------------------------------------------------------------------------------------------------------------------------------------------------------------------------------------------------------------------------------------------------------------------------|----------------------------------------|------------|-----------------------------------------------------|----------------------------------------------------------------------------------------------------------|-----------------------------------------------------------------------------------------------------------------|-------------------|
| Cambodia                                                                                                                                                                                                                                                                                                                                                                                                                                                                                                                                                                                                                                                                |                                        |            | Convenience                                         | United States Pharmacopeia                                                                               | <i>HPLC-DAD</i>                                                                                                 |                   |
| Khurelbat. D, 2020 [26]<br>Mongolia                                                                                                                                                                                                                                                                                                                                                                                                                                                                                                                                                                                                                                     | Amlodipine                             | Unknown    | Pharmacy outlets/ Random                            | British Pharmacopoeia, Pharmacopoeia of the People's Republic of China, Mongolian National Pharmacopoeia | API content, Visual inspection, Weight variation, Disintegration, Friability, Dissolution<br><br><i>HPLC-UV</i> | 8/118 (6.8%)      |
| Sakuda, Mirai, 2020 [27]<br>Myanmar                                                                                                                                                                                                                                                                                                                                                                                                                                                                                                                                                                                                                                     | Candesartan                            | Unknown    | Hospitals, pharmacies, and wholesalers/ Unspecified | British Pharmacopoeia, United State Pharmacopoeia, Japanese Pharmacopoeia                                | API content, Content uniformity, Dissolution<br><br><i>Method Unstated</i>                                      | 1/10 (10.0%)      |
| RP, reverse phase; HPLC, High-performance liquid chromatography; MS, Mass spectrometry; UV, Ultraviolet; TLC, Thin Layer Chromatography; FTIR, Fourier transformed infrared spectroscopy; LC, Liquid Chromatography; DAD, Diode-Array Detection; NIR, Near-infrared spectroscopy, TGA, Thermogravimetric; HTCZ, Hydrochlorothiazide; BP, British Pharmacopoeia; USP, United States Pharmacopoeia; API, Active Pharmaceutical Ingredient<br>*Samples were tested by both high-performance liquid chromatography (HPLC) and Raman spectrophotometry, with inconsistent results between the two techniques. Only the reference HPLC results were retained in our analysis. |                                        |            |                                                     |                                                                                                          |                                                                                                                 |                   |

- 1 Nazerali H, Machedwa T, Hogerzeil H. Stability of essential drugs in tropical climates (Zimbabwe). <https://apps.who.int/medicinedocs/pdf/s2206e/s2206e.pdf> (accessed 20 Sep 2019).
- 2 Westenberger BJ, Ellison CD, Fussner AS, *et al.* Quality assessment of internet pharmaceutical products using traditional and non-traditional analytical techniques. *Int J Pharm* 2005;**306**:56–70. doi:10.1016/j.ijpharm.2005.08.027
- 3 Schwertner HA, Storrow AB. Comparison of actual and stated concentrations of pharmaceuticals manufactured in Mexico. *Clin Ther* 2005;**27**:609–15. doi:10.1016/j.clinthera.2005.05.007

- 4 Extent of Spurious (Counterfeit) Medicines in India. [https://drive.google.com/file/d/1W\\_vTtByEOFIV6QQHoHvETCInPz6IGCbu/view](https://drive.google.com/file/d/1W_vTtByEOFIV6QQHoHvETCInPz6IGCbu/view) (accessed 3 Jun 2019).
- 5 Qureshi S, Industrial IM-D development and, 1998 U. Assessment of pharmaceutical quality of furosemide tablets from multinational markets. *Taylor Fr* doi:<https://doi.org/10.3109/03639049809089943>
- 6 CDSCO G of I. Report on countrywide survey for spurious drugs. Cent. Drugs Stand. Control Organ. CDSCO, India. 2009.[https://cdsco.gov.in/opencms/opencms/system/modules/CDSCO.WEB/elements/download\\_file\\_division.jsp?num\\_id=MTU1Nw==](https://cdsco.gov.in/opencms/opencms/system/modules/CDSCO.WEB/elements/download_file_division.jsp?num_id=MTU1Nw==) (accessed 12 Dec 2020).
- 7 Twagirumukiza M, Pringels E, Remon JP, *et al.* Influence of Tropical Climate Conditions on the Quality of Antihypertensive Drugs from Rwandan Pharmacies. *Am J Trop Med Hyg* 2009;**81**:776–81. doi:[10.4269/ajtmh.2009.09-0109](https://doi.org/10.4269/ajtmh.2009.09-0109)
- 8 Markman BEO, Rosa PCP, Koschtschak MRW, *et al.* Assessment of the quality of simvastatin capsules from compounding pharmacies. *Rev Saude Publica* 2010;**44**:1055–62. doi:<http://dx.doi.org/10.1590/S0034-89102010000600010>
- 9 Bate R. Assessing website pharmacy drug quality: Safer than you think? *PLoS One* 2010;**5**:e12199. doi:<http://dx.doi.org/10.1371/journal.pone.0012199>
- 10 Lima L., Benetoli A, Gianotto E, *et al.* Quality evaluation of compounded capsules. *Lat Am J Pharm* 2011;**30**:1943.[http://www.latamjpharm.org/trabajos/30/10/LAJOP\\_30\\_10\\_1\\_11\\_R1QY9O4WS3.pdf](http://www.latamjpharm.org/trabajos/30/10/LAJOP_30_10_1_11_R1QY9O4WS3.pdf)
- 11 Marques-Marinho FD, Zanon JCD, Sakurai E, *et al.* Quality evaluation of simvastatin compounded capsules. *Brazilian J Pharm Sci* 2011;**47**:495–502. doi:<http://dx.doi.org/10.1590/S1984-82502011000300007>

- 12 Yusuf I, Lee D, Fatehzada Z, *et al.* Afghanistan Medicines Sampling and Testing - A Quantitative Survey | Management Sciences for Health. *Manag. Sci. Heal.* 2011.<https://www.msh.org/resources/afghanistan-medicines-sampling-and-testing-a-quantitative-survey> (accessed 12 Dec 2020).
- 13 Karlage KL, Franklin SJ, Mufich WC, *et al.* Comparative evaluation of pharmaceutical products obtained in Mexico: Augmenting existing scientific data. *Drug Dev Ind Pharm* 2012;**38**:808–14. doi:<http://dx.doi.org/10.3109/03639045.2011.628678>
- 14 A. P, R. G, P. N, *et al.* Quality of generic medicines in South Africa: perceptions versus reality - a qualitative study. *BMC Health Serv Res* 2012;**12**:297. doi:10.1186/1472-6963-12-297
- 15 Kahsay G, Dhulipalla RL, Van Nyen G, *et al.* Analysis of purity of clopidogrel and acetylsalicylic acid in combined oral dosage forms. *Curr Pharm Anal* 2013;**9**:82–91. doi:DOI: 10.2174/157341213804806070
- 16 Al-Qatamin S, A. The evaluation and analysis of counterfeit pharmaceuticals within Jordan. Published Online First: 2014.<https://core.ac.uk/download/pdf/30617878.pdf>
- 17 Fukami T, Koide T, Hisada H, *et al.* Pharmaceutical evaluation of atorvastatin calcium tablets available on the Internet: A preliminary investigation of substandard medicines in Japan. *J Drug Deliv Sci Technol* 2016;**31**:35–40. doi:<http://dx.doi.org/10.1016/j.jddst.2015.11.006>
- 18 Antignac M, Diop B. *Quality assessment of 7 cardiovascular drugs in 10 sub-Saharan countries: The SEVEN study*. M. Antignac, Department of Pharmacy, Saint-Antoine Hospital, East Paris University Hospitals, AP-HP, 184 Rue du Faubourg Saint-Antoine, Paris 75012, France. E-mail: marie.antignac@aphp.fr: American Medical Association (E-mail: smcleod@itsa.ucsf.edu) 2017. doi:<http://dx.doi.org/10.1001/jamacardio.2016.3851>
- 19 Petersen A, Held N. Surveillance for falsified and substandard medicines in Africa and Asia by local organizations using the low-cost GPHF

- Minilab. *PLoS One* 2017;**12**:e0184165. doi:<http://dx.doi.org/10.1371/journal.pone.0184165>
- 20 Schafermann S, Wemakor E, Hauk C. Quality of medicines in southern Togo: Investigation of antibiotics and of medicines for non-communicable diseases from pharmacies and informal vendors. *PLoS One* 2018;**13**:e0207911. doi:<http://dx.doi.org/10.1371/journal.pone.0207911>
- 21 Kakio T, Nagase H, Takaoka T, *et al.* Survey to identify substandard and falsified tablets in several Asian countries with pharmacopeial quality control tests and principal component analysis of handheld raman spectroscopy. *Am J Trop Med Hyg* 2018;**98**:1643–52. doi:<http://dx.doi.org/10.4269/ajtmh.17-0553>
- 22 Ashames A, Abushoffa A, Tabet M, *et al.* Impact of the Libyan Conflict on Quality of Medicines Available in the Local Market. Available online [www.jocpr.com](http://www.jocpr.com) *J Chem Pharm Res* 2019;**11**:20–7. <http://www.jocpr.com/articles/impact-of-the-libyan-conflict-on-quality-of-medicines-available-in-the-local-market.pdf>
- 23 Ndichu E., Ohiri K, Sekoni O, *et al.* Evaluating the quality of antihypertensive drugs in Lagos State, Nigeria. *PLoS One* 2019;**14**. doi:<http://dx.doi.org/10.1371/journal.pone.0211567>
- 24 Redfern J, Kaur H, Adedoyin RA, *et al.* Equivalence in Active Pharmaceutical Ingredient of Generic Antihypertensive Medicines Available in Nigeria (EQUIMEDS): A Case for Further Surveillance. *Glob Heart* 2019;**14**:327–33. doi:10.1016/j.gheart.2019.07.006
- 25 Rahman MS, Yoshida N, Tsuboi H, *et al.* A cross-sectional investigation of the quality of selected medicines for noncommunicable diseases in private community drug outlets in Cambodia during 2011–2013. *Am J Trop Med Hyg* 2019;**101**:1018–26. doi:<http://dx.doi.org/10.4269/ajtmh.19-0247>
- 26 Khurelbat D, Dorj G, Sunderland B, *et al.* A cross-sectional analysis of falsified, counterfeit and substandard medicines in a low-middle income country. *BMC Public Health* 2020;**20**:743. doi:10.1186/s12889-020-08897-x



- 27 Sakuda M, Yoshida N, Takaoka T, *et al.* Substandard and Falsified Medicines in Myanmar. *Pharmacy* 2020;**8**:45. doi:10.3390/pharmacy8010045
