# Supplementary material for: The quality of medical products for cardiovascular diseases: a gap in global cardiac care
Source: PubMed Central journal article supplement (PMC8442059; doi:10.1136/bmjgh-2021-006523), 2021-09-14
Supplement: bmjgh-2021-006523supp008.pdf [file bmjgh-2021-006523supp008.pdf]

**Supplementary file 8: Failure frequency by region of the stated manufacturer in prevalence surveys**

*Because of the limited number of samples tested for quality in the studies included in this review, the figures should not be interpreted as representative of the prevalence of specific SF cardiovascular medicines (please refer to the discussion section of the current paper for more details)*

*Failure frequency is defined as the proportion of samples that failed at least one quality test*

| <b>Continent</b> | <b>Failure Frequency n/N (%)</b> |
|------------------|----------------------------------|
| <b>Americas</b>  | 50.0% (3/6)                      |
| <b>Africa</b>    | 17.5% (37/211)                   |
| <b>Asia</b>      | 15.9% (118/744)                  |
| <b>Europe</b>    | 8.2% (85/1,035)                  |
| <b>Unknown</b>   | 19.9% (282/1,418)                |
| <b>Total</b>     | <b>15.4% (525/3,414)</b>         |
