# Supplementary material for: The quality of medical products for cardiovascular diseases: a gap in global cardiac care
Source: PubMed Central journal article supplement (PMC8442059; doi:10.1136/bmjgh-2021-006523), 2021-09-14
Supplement: bmjgh-2021-006523supp009.pdf [file bmjgh-2021-006523supp009.pdf]

### Supplementary file 9. Frequency of agreement with the 26 items of the MEDQUARG checklist of the 21 prevalence surveys of cardiovascular medicines quality

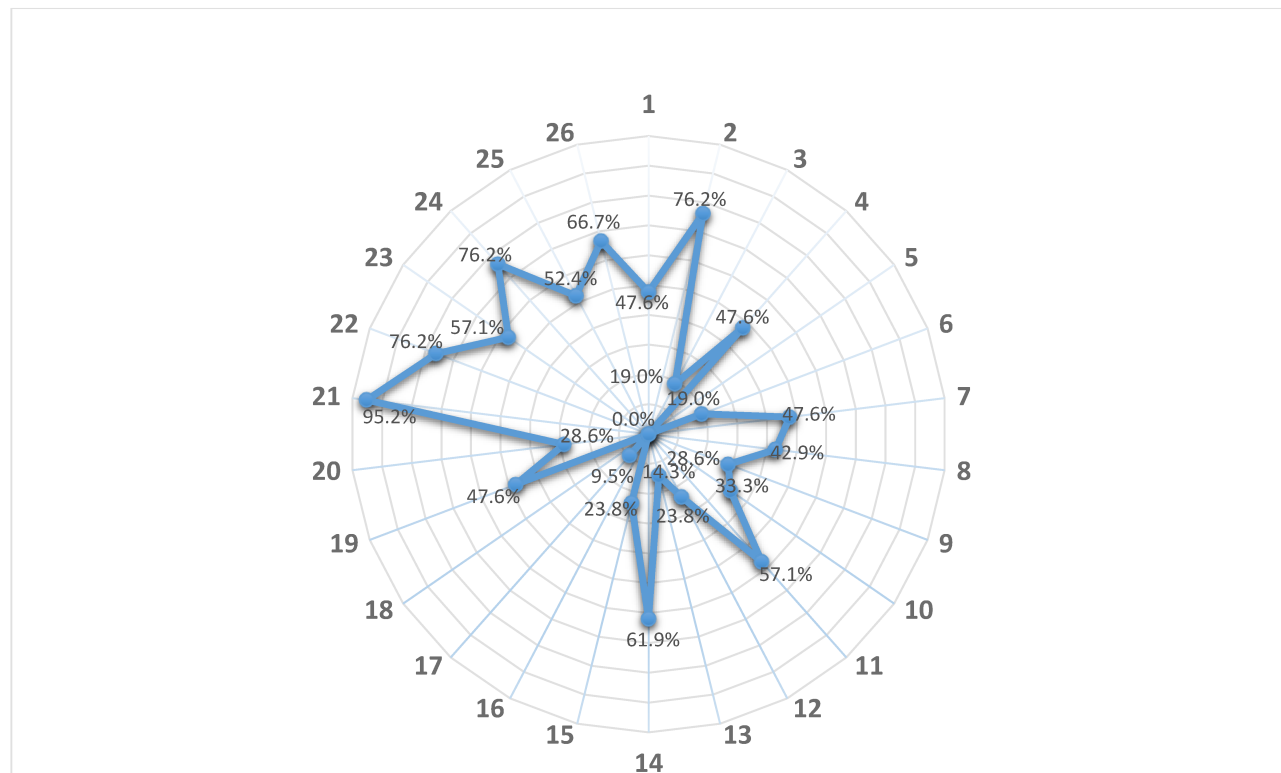

*Definition of items:* 1. Title/abstract/keywords 2. Introduction.

*Methods (items 3-13):* 3. Survey details 4. Definitions 5. Outlets 6. Sampling design 7. Samplers 8. Statistical methods 9. Ethical issues 10. Packaging 11. Chemical analysis 12. Method validation 13. Blinding. *Results (items 14-20):* 14. Outlets (actual) 15. Missing samples 16. Packaging and chemistry results 17. Category of poor quality medicine 18. State company and address as given on packaging 19. Sharing data with MRA 20. Dissemination. *Discussion (items 21-24):* 21. Key results 22. Limitations 23. Interpretation 24. Intervention. *Declaration:* 25. Conflict of interest 26. Funding.

| No                | Item                                            | Bate & Hess, 2010 | SEARPharm, 2007 | Karlage et al, 2011 | Westendberger et al, 2005 | Difam-EPN Minilab, 2017 | Twagirumukiza et al, 2009 | Schaferman et al, 2018 | Lima et al, 2011 |
|-------------------|-------------------------------------------------|-------------------|-----------------|---------------------|---------------------------|-------------------------|---------------------------|------------------------|------------------|
| 1                 | Title/abstract/keywords                         | N                 | N               | Y                   | Y                         | N                       | N                         | Y                      | Y                |
| 2                 | Introduction                                    | Y                 | Y               | Y                   | N                         | Y                       | Y                         | Y                      | Y                |
| <b>Methods</b>    |                                                 |                   |                 |                     |                           |                         |                           |                        |                  |
| 3                 | Survey details                                  | Y                 | N               | N                   | N                         | N                       | N                         | N                      | N                |
| 4                 | Definitions                                     | N                 | Y               | Y                   | N                         | Y                       | N                         | Y                      | N                |
| 5                 | Outlets                                         | N                 | N               | N                   | N                         | N                       | N                         | N                      | N                |
| 6                 | Sampling design                                 | Y                 | Y               | N                   | N                         | N                       | N                         | Y                      | N                |
| 7                 | Samplers                                        | Y                 | Y               | N                   | N                         | Y                       | N                         | Y                      | N                |
| 8                 | Statistical methods                             | N                 | N               | N                   | N                         | N                       | N                         | Y                      | N                |
| 9                 | Ethical issues                                  | N                 | N               | N                   | N                         | N                       | N                         | N                      | N                |
| 10                | Packaging                                       | N                 | Y               | N                   | Y                         | N                       | N                         | N                      | N                |
| 11                | Chemical analysis                               | Y                 | N               | N                   | Y                         | Y                       | N                         | Y                      | N                |
| 12                | Method validation                               | N                 | N               | N                   | N                         | N                       | N                         | Y                      | N                |
| 13                | Blinding                                        | N                 | N               | N                   | N                         | N                       | Y                         | N                      | N                |
| <b>Results</b>    |                                                 |                   |                 |                     |                           |                         |                           |                        |                  |
| 14                | Outlets                                         | Y                 | N               | N                   | Y                         | N                       | Y                         | Y                      | N                |
| 15                | Missing samples                                 | Y                 | Y               | N                   | N                         | N                       | N                         | Y                      | N                |
| 16                | Packaging and chemistry results                 | N                 | N               | N                   | N                         | N                       | N                         | N                      | N                |
| 17                | Category of poor-quality medicine               | N                 | N               | N                   | N                         |                         | N                         | N                      | N                |
| 18                | State company and address as given on packaging | N                 | N               | N                   | N                         | N                       | N                         | N                      | N                |
| 19                | Sharing data with MRA                           | N                 | Y               | N                   | Y                         | Y                       | N                         | N                      | N                |
| 20                | Dissemination                                   | N                 | N               | N                   | N                         | Y                       | N                         | N                      | N                |
| <b>Discussion</b> |                                                 |                   |                 |                     |                           |                         |                           |                        |                  |
| 21                | Key results                                     | N                 | Y               | Y                   | Y                         | Y                       | Y                         | Y                      | Y                |
| 22                | Limitations                                     | Y                 | Y               | Y                   | Y                         | Y                       | Y                         | Y                      | N                |
| 23                | Interpretation                                  | N                 | Y               | N                   | Y                         | Y                       | N                         | Y                      | N                |
| 24                | Intervention                                    | Y                 | N               | N                   | N                         | Y                       | Y                         | Y                      | Y                |

| No                       | Item                 | Bate & Hess, 2010 | SEARPharm, 2007 | Karlage et al, 2011 | Westendberger et al, 2005 | Difam-EPN Minilab, 2017 | Twagirumukiza et al, 2009 | Schaferman n et al, 2018 | Lima et al, 2011 |
|--------------------------|----------------------|-------------------|-----------------|---------------------|---------------------------|-------------------------|---------------------------|--------------------------|------------------|
| <b>Other Information</b> |                      |                   |                 |                     |                           |                         |                           |                          |                  |
| 25                       | Conflict of interest | Y                 | N               | Y                   | N                         | Y                       | Y                         | Y                        | N                |
| 26                       | Funding              | Y                 | N               | N                   | N                         | Y                       | Y                         | Y                        | N                |
|                          | Total score          | 11                | 10              | 6                   | 8                         | 12                      | 8                         | 16                       | 4                |
|                          |                      | 42.3%             | 38.5%           | 23.1%               | 30.8%                     | 46.2%                   | 30.8%                     | 61.5%                    | 15.4%            |

Y : Yes, N : No

| No             | Item                              | Fukami et al, 2015 | Macquart de Terline et al, 2017 | Marques-Marinho et al, 2011 | Schwertner & Storrow, 2005 | Qureshi & McGilveray, 1998 | Ashames et al, 2019 | Al-Qatamin, 2012 | Ndichu et al, 2019 |
|----------------|-----------------------------------|--------------------|---------------------------------|-----------------------------|----------------------------|----------------------------|---------------------|------------------|--------------------|
| 1              | Title/abstract/keywords           | N                  | Y                               | N                           | Y                          | N                          | N                   | N                | N                  |
| 2              | Introduction                      | Y                  | N                               | N                           | Y                          | N                          | Y                   | Y                | N                  |
| <b>Methods</b> |                                   |                    |                                 |                             |                            |                            |                     |                  |                    |
| 3              | Survey details                    | N                  | Y                               | N                           | N                          | N                          | N                   | N                | N                  |
| 4              | Definitions                       | Y                  | Y                               | N                           | N                          | N                          | N                   | Y                | Y                  |
| 5              | Outlets                           | N                  | N                               | N                           | N                          | N                          | N                   | N                | N                  |
| 6              | Sampling design                   | N                  | N                               | N                           | N                          | N                          | N                   | N                | N                  |
| 7              | Samplers                          | N                  | Y                               | N                           | N                          | N                          | N                   | N                | Y                  |
| 8              | Statistical methods               | N                  | Y                               | Y                           | N                          | Y                          | N                   | N                | Y                  |
| 9              | Ethical issues                    | N                  | N                               | N                           | Y                          | N                          | N                   | N                | Y                  |
| 10             | Packaging                         | Y                  | N                               | N                           | N                          | N                          | N                   | Y                | N                  |
| 11             | Chemical analysis                 | N                  | Y                               | N                           | N                          | Y                          | N                   | Y                | N                  |
| 12             | Method validation                 | N                  | Y                               | Y                           | Y                          | N                          | N                   | N                | N                  |
| 13             | Blinding                          | N                  | Y                               | N                           | N                          | N                          | N                   | N                | N                  |
| <b>Results</b> |                                   |                    |                                 |                             |                            |                            |                     |                  |                    |
| 14             | Outlets                           | Y                  | Y                               | Y                           | N                          | N                          | N                   | N                | Y                  |
| 15             | Missing samples                   | N                  | Y                               | N                           | N                          | N                          | N                   | N                | Y                  |
| 16             | Packaging and chemistry results   | N                  | N                               | N                           | N                          | N                          | N                   | N                | N                  |
| 17             | Category of poor-quality medicine | N                  | N                               | N                           | N                          | N                          | N                   | Y                | N                  |

| No                       | Item                                            | Fukami et al, 2015 | Macquart de Terline et al, 2017 | Marques-Marinho et al, 2011 | Schwertner & Storrow, 2005 | Qureshi & McGilveray, 1998 | Ashames et al, 2019 | Al-Qatamin, 2012 | Ndichu et al, 2019 |
|--------------------------|-------------------------------------------------|--------------------|---------------------------------|-----------------------------|----------------------------|----------------------------|---------------------|------------------|--------------------|
| 18                       | State company and address as given on packaging | N                  | N                               | N                           | N                          | N                          | N                   | N                | N                  |
| 19                       | Sharing data with MRA                           | N                  | Y                               | N                           | N                          | Y                          | N                   | Y                | N                  |
| 20                       | Dissemination                                   | Y                  | N                               | N                           | N                          | N                          | N                   | Y                | Y                  |
| <b>Discussion</b>        |                                                 |                    |                                 |                             |                            |                            |                     |                  |                    |
| 21                       | Key results                                     | Y                  | Y                               | Y                           | Y                          | Y                          | Y                   | Y                | Y                  |
| 22                       | Limitations                                     | N                  | Y                               | N                           | Y                          | N                          | N                   | Y                | Y                  |
| 23                       | Interpretation                                  | N                  | Y                               | N                           | Y                          | N                          | N                   | Y                | N                  |
| 24                       | Intervention                                    | Y                  | Y                               | N                           | Y                          | N                          | Y                   | Y                | Y                  |
| <b>Other Information</b> |                                                 |                    |                                 |                             |                            |                            |                     |                  |                    |
| 25                       | Conflict of interest                            | N                  | Y                               | N                           | N                          | N                          | Y                   | N                | Y                  |
| 26                       | Funding                                         | Y                  | Y                               | Y                           | N                          | N                          | Y                   | N                | Y                  |
|                          | Total score                                     | 8                  | 17                              | 5                           | 8                          | 4                          | 5                   | 11               | 12                 |
|                          |                                                 | 30.8%              | 65.4%                           | 19.2%                       | 30.8%                      | 15.4%                      | 19.2%               | 42.3%            | 46.2%              |

Y : Yes, N : No

| No             | Item                    | Khurelbat et al, 2020 | Sakuda, M et al, 2020 | Julie Redfern et al, 2019 | Yusuf I et al, 2011 | Rahman M.S et al, 2019 |
|----------------|-------------------------|-----------------------|-----------------------|---------------------------|---------------------|------------------------|
| 1              | Title/abstract/keywords | Y                     | N                     | Y                         | Y                   | Y                      |
| 2              | Introduction            | Y                     | Y                     | Y                         | Y                   | Y                      |
| <b>Methods</b> |                         |                       |                       |                           |                     |                        |
| 3              | Survey details          | Y                     | N                     | N                         | Y                   | N                      |
| 4              | Definitions             | Y                     | N                     | Y                         | N                   | N                      |
| 5              | Outlets                 | N                     | N                     | N                         | N                   | N                      |
| 6              | Sampling design         | Y                     | N                     | N                         | N                   | N                      |
| 7              | Samplers                | Y                     | N                     | Y                         | Y                   | Y                      |
| 8              | Statistical methods     | Y                     | Y                     | Y                         | N                   | Y                      |

| No                       | Item                                            | Khurelbat et al, 2020 | Sakuda, M et al, 2020 | Julie Redfern et al, 2019 | Yusuf I et al, 2011 | Rahman M.S et al, 2019 |
|--------------------------|-------------------------------------------------|-----------------------|-----------------------|---------------------------|---------------------|------------------------|
| 9                        | Ethical issues                                  | Y                     | Y                     | Y                         | N                   | Y                      |
| 10                       | Packaging                                       | Y                     | Y                     | N                         | N                   | Y                      |
| 11                       | Chemical analysis                               | Y                     | Y                     | Y                         | Y                   | Y                      |
| 12                       | Method validation                               | N                     | N                     | N                         | N                   | Y                      |
| 13                       | Blinding                                        | N                     | N                     | N                         | Y                   | N                      |
| <b>Results</b>           |                                                 |                       |                       |                           |                     |                        |
| 14                       | Outlets                                         | Y                     | Y                     | Y                         | Y                   | Y                      |
| 15                       | Missing samples                                 | N                     | N                     | N                         | N                   | N                      |
| 16                       | Packaging and chemistry results                 | N                     | N                     | N                         | N                   | N                      |
| 17                       | Category of poor-quality medicine               | N                     | N                     | Y                         | N                   | N                      |
| 18                       | State company and address as given on packaging | N                     | N                     | N                         | N                   | N                      |
| 19                       | Sharing data with MRA                           | Y                     | Y                     | N                         | Y                   | Y                      |
| 20                       | Dissemination                                   | Y                     | Y                     | N                         | N                   | N                      |
| <b>Discussion</b>        |                                                 |                       |                       |                           |                     |                        |
| 21                       | Key results                                     | Y                     | Y                     | Y                         | Y                   | Y                      |
| 22                       | Limitations                                     | Y                     | Y                     | Y                         | Y                   | Y                      |
| 23                       | Interpretation                                  | Y                     | Y                     | Y                         | Y                   | Y                      |
| 24                       | Intervention                                    | Y                     | Y                     | Y                         | Y                   | Y                      |
| <b>Other Information</b> |                                                 |                       |                       |                           |                     |                        |
| 25                       | Conflict of interest                            | Y                     | Y                     | Y                         | N                   | N                      |
| 26                       | Funding                                         | Y                     | Y                     | Y                         | Y                   | Y                      |
|                          | Total score                                     | 19                    | 14                    | 15                        | 13                  | 15                     |
|                          |                                                 | 73.1%                 | 53.8%                 | 57.7%                     | 50.0%               | 57.7%                  |

Y : Yes, N : No
