# Supplementary material for: The quality of medical products for cardiovascular diseases: a gap in global cardiac care
Source: PubMed Central journal article supplement (PMC8442059; doi:10.1136/bmjgh-2021-006523), 2021-09-14
Supplement: bmjgh-2021-006523supp010.pdf [file bmjgh-2021-006523supp010.pdf]

## Supplementary file 10. Characteristics of equivalence surveys of cardiovascular medicines

| Reference / country of collection          | Active pharmaceutical ingredient (API) | Brand name                                                                                                                                  | Outlet                   | Reference standard                       | Test(s) performed and analytical technique for API content/Impurities                                                                                             | Failure frequency n/N (%) |
|--------------------------------------------|----------------------------------------|---------------------------------------------------------------------------------------------------------------------------------------------|--------------------------|------------------------------------------|-------------------------------------------------------------------------------------------------------------------------------------------------------------------|---------------------------|
| Julide Akbuga, 1987 [1]<br>Turkey          | Furosemide                             | Unknown                                                                                                                                     | Unknown                  | USP 20                                   | API Content, Weight uniformity, Hardness, Friability, Disintegration, Dissolution<br><br><i>Thin-Layer Chromatography TLC</i>                                     | 2 /9(22.2%)               |
| S Sakolkhai, 1991 [2]<br>Thailand          | Spironolactone                         | Generic                                                                                                                                     | Hospital and drug stores | USP                                      | API content and Dissolution<br><br><i>HPLC (unknown detector)</i>                                                                                                 | 2/3 (66.7%)               |
| L. Nikolic, 1994 [3]<br>Serbia             | Acetylsalicylic acid                   | Unknown                                                                                                                                     | Unknown                  | USP 1985                                 | API content, dissolution, weight variation, disintegration time, crushing strength and friability<br><br><i>HPLC-DAD</i>                                          | 6/6 (100.0%)              |
| Baloglu , 2001 [4]<br>Turkey               | Enalapril                              | Generic                                                                                                                                     | Pharmacies               | USP                                      | API content, Weight Variation, Hardness, Disintegration, Diameter-Thickness Ratio, Friability, Content Uniformity, Dissolution<br><br><i>UV-Spectrophotometry</i> | 8/8 (100.0%)              |
| Ming-shin L, 2010 [5]<br>Taiwan            | Hydrochlorothiazide                    | Unknown- 15 domestic products and one imported from the UK                                                                                  | Unknown                  | USP                                      | Dissolution, Content Uniformity<br><br><i>HPLC-UV</i>                                                                                                             | 10/16 (62.5%)             |
| Gomez , 2003 [6]<br>Asia and South America | Clopidogrel                            | Plagril<br>Clodrel®<br>Orawis®<br>Noklot®<br>Clopigrel®<br>Preva®<br>Clavix®<br>Clopilet®<br>Stromix®<br>Cloplat-75®<br>Deplatt®<br>Cerugin | Unknown                  | European Pharmacopeia 2002 +<br>USP 2000 | API content, Dissolution, Impurity<br><br><i>HPLC (unknown detector)</i><br><i>LC (unknown detector)</i>                                                          | 16 /19 (84.2%)            |

| Reference / country of collection                       | Active pharmaceutical ingredient (API)   | Brand name                                                                                                                                                                                      | Outlet             | Reference standard                                 | Test(s) performed and analytical technique for API content/Impurities                                                    | Failure frequency n/N (%) |
|---------------------------------------------------------|------------------------------------------|-------------------------------------------------------------------------------------------------------------------------------------------------------------------------------------------------|--------------------|----------------------------------------------------|--------------------------------------------------------------------------------------------------------------------------|---------------------------|
|                                                         |                                          | Cloplatic®<br>Plagrel®<br>Nefazan®<br>Talcom®<br>Clopifran®                                                                                                                                     |                    |                                                    |                                                                                                                          |                           |
| Karl-Uwe Petersen, 2003 [7]<br>Germany                  | Felodipine                               | Generic                                                                                                                                                                                         | Pharmacies         | USP 22                                             | API content and Dissolution<br><br><i>UV- Spectroscophotometry</i>                                                       | 0 /7(0.0%)                |
| C Longstaff, 2004 [8]<br>Multicountry L/MIC countries   | Streptokinase                            | Unknown                                                                                                                                                                                         | Unknown            | European pharmacopeia BP                           | API content<br><br><i>Chromogenic methods</i>                                                                            | 15 /18(83.3%)             |
| Teshome Dires, 2005 [9]<br>Ethiopia                     | Methylodopa<br>Propranolol<br>Furosemide | Generic<br>Aldomet<br>Dopegyt<br>Inderal<br>Emforal<br>Lasix<br>Fusix                                                                                                                           | Private pharmacies | BP 2001,<br>USP 27                                 | API Content, Weight uniformity, Hardness, Friability, Disintegration, Dissolution<br><br><i>UV/Vis spectrophotometry</i> | 1/9 (11.1%)               |
| Smith, 2005 [10]<br>Serbia and Montenegro               | Carvedilol                               | Carbetalol<br>Carloc<br>Carvedilol<br>Carvista<br>Coritensil<br>Diola<br>Karvedilol<br>Talliton<br>Vivacor<br>Coryol<br>Karvileks<br>Milenol<br>Talliton<br>Coronat<br>Longcardio<br>V-Block-PT | Distributors       | European Pharmacopeia + Roche specifications + USP | API content, Dissolution, Impurity, Hardness<br><br><i>HPLC-UV<br/>UV-spectrophotometry</i>                              | 17/35 (44.7%)             |
| Hermentin, 2005 [11]<br>Brazil, India, Jordan, Pakistan | Streptokinase                            | Akinase<br>Unitinase<br>Kabikinase<br>Durakinase                                                                                                                                                | Distributors       | European Pharmacopoeia 2002                        | API content , impurity<br><br><i>UV-Spectrophotometry</i>                                                                | 18/20 (90.0%)             |

| Reference / country of collection                                                  | Active pharmaceutical ingredient (API) | Brand name                                                                                                                                                                 | Outlet     | Reference standard                                               | Test(s) performed and analytical technique for API content/Impurities                                                                           | Failure frequency n/N (%) |
|------------------------------------------------------------------------------------|----------------------------------------|----------------------------------------------------------------------------------------------------------------------------------------------------------------------------|------------|------------------------------------------------------------------|-------------------------------------------------------------------------------------------------------------------------------------------------|---------------------------|
|                                                                                    |                                        | Streptokinase<br>Eskinase<br>Icikinase<br>Thrombosolv<br>Strek<br>Solustrep<br>Streptonase<br>Icikinase<br>Heberkinase<br>STPase                                           |            |                                                                  |                                                                                                                                                 |                           |
| Vetchy, 2007 [12]<br>Czech Republic                                                | Felodipine                             | Plenil®<br>Presid®                                                                                                                                                         | Unknown    | European Pharmacopoeia 4.0<br>Czech Pharmacopoeia 2002<br>USP 26 | Dissolution test<br><br><i>UV spectrophotometry</i>                                                                                             | 4/6 (66.7%)               |
| R. Panchagnula, 2007 [13]<br>India                                                 | Nifedipine                             | Adalat retard OROS<br>Calbloc retard<br>Calcigard retard<br>Cardules retard<br>Depicor SR<br>Depin retard<br>Nicardia retard<br>Nifedine SR<br>Nifelet retard              | Pharmacies | Unspecified                                                      | API Content, Weight uniformity, Hardness, Friability, Disintegration, Dissolution<br><br><i>UV/Vis spectrophotometry</i>                        | 0/15 (0.0%)               |
| Veronin, 2008 [14]<br>Canada, United Kingdom, India, Mexico, Spain, Thailand, Fiji | Simvastatin                            | Zocor<br>Apo-Simvastatin<br>Co-Simvastatin<br>Novo-Simvastatin<br>Pms-Simvastatin<br>Simlo-20<br>SIMLIP-20<br>Starstat<br>Simi-20<br>Zorced<br>Simvastatina<br>Simastin 20 | Website    | USP 2003                                                         | API content, API identification, Appearance, Content uniformity, Disintegration, Dissolution, Hardness, Mass uniformity<br><br><i>HPLC -DAD</i> | 7/19 (36.8%)              |

| Reference / country of collection                                                                                                         | Active pharmaceutical ingredient (API) | Brand name                                                                                                        | Outlet           | Reference standard                                                | Test(s) performed and analytical technique for API content/Impurities                                                              | Failure frequency n/N (%) |
|-------------------------------------------------------------------------------------------------------------------------------------------|----------------------------------------|-------------------------------------------------------------------------------------------------------------------|------------------|-------------------------------------------------------------------|------------------------------------------------------------------------------------------------------------------------------------|---------------------------|
|                                                                                                                                           |                                        | Bestatin 20<br>Simlup-20                                                                                          |                  |                                                                   |                                                                                                                                    |                           |
| Dione M Lima, 2008 [15]<br>Brazil                                                                                                         | Enalapril                              | Unknown                                                                                                           | Unknown          | USP                                                               | API content and Dissolution<br><br><i>HPLC-UV</i>                                                                                  | 2 /9(22.2%)               |
| Angeli, 2009 [16]<br>Thailand, Hungary, Czech Republic, Panama, South Africa, Belgium, Brazil, India, Pakistan, Dominican Republic, China | Ramipril                               | Generic                                                                                                           | Unknown          | European Pharmacopeia 2007<br>Sanofi-Aventis specification<br>USP | API content, Dissolution, Stability, Impurities<br><br><i>HPLC (unknown detector)</i>                                              | 16/21 (76.2%)             |
| De Braekeleer, 2009 [17]<br>Belgium                                                                                                       | Nifedipine                             | Adalat<br>Adalat Oros<br>Adalat Retard<br>Docnifedipine<br>Hypan<br>Nifedipine<br>Ratiopharm                      | Unknown          | BP 2009<br>USP 2009<br>European Pharmacopeia 2005                 | API content, Related Substances, Dissolution, Content Uniformity<br><br><i>HPLC-UV</i>                                             | 0/ 9 (0.0%)               |
| Okoye, 2009 [18]<br>Nigeria                                                                                                               | Nifedipine                             | Generic                                                                                                           | Unknown          | BP<br>USP 2002                                                    | API content, Disintegration, Dissolution, Friability, Hardness, Thickness, Weight, Diameter<br><br><i>UV/Vis spectrophotometry</i> | 0/7 (0.0%)                |
| Benkovic , 2010 [19]<br>Croatia                                                                                                           | Lisinopril                             | Amicor<br>Iruimed<br>Laaven<br>Lizinopril-Farmal<br>Lizinopril Lek<br>Optimon<br>Skopryl<br>Vitopril<br>Lisinolex | Unknown          | European Pharmacopeia 2007                                        | Impurities<br><br><i>HPLC (unknown detector)</i>                                                                                   | 0/9 (0.0%)                |
| Bunhak, 2010 [20]<br>Brazil                                                                                                               | Acetylsalicylic acid                   | Generic                                                                                                           | Basic pharmacies | USP 23,<br>BP 1999,                                               | API content, Content uniformity, Disintegration, Dissolution,                                                                      | 6/ 8 (75.0%)              |

| Reference / country of collection   | Active pharmaceutical ingredient (API) | Brand name                                                                                       | Outlet             | Reference standard                    | Test(s) performed and analytical technique for API content/Impurities                                                                                           | Failure frequency n/N (%) |
|-------------------------------------|----------------------------------------|--------------------------------------------------------------------------------------------------|--------------------|---------------------------------------|-----------------------------------------------------------------------------------------------------------------------------------------------------------------|---------------------------|
|                                     |                                        |                                                                                                  |                    | Brazilian Pharmacopeia                | Friability, Hardness, Mass uniformity<br><br><i>Titrimetry</i><br><i>UV-Spectrophotometry (dissolution)</i>                                                     |                           |
| Patel, P, 2010 [21]<br>India        | Telmisartan                            | Unknown                                                                                          | Unknown            | USP                                   | API Content, Weight uniformity, Hardness, Friability, Disintegration, Dissolution<br><br><i>UV/Vis spectrophotometry</i>                                        | 0/12 (0.0%)               |
| Mus'ab M. Khalaf, 2010 [22]<br>Iraq | Furosemide                             | Apix<br>Desal<br>Lasimex<br>Salex                                                                | Private pharmacies | BP, USP                               | API content, Disintegration, Dissolution, Hardness, Weight uniformity<br><br><i>Unstated technique</i>                                                          | 0/5 (0.0%)                |
| Eichie, 2011 [23]<br>Nigeria        | Amlodipine                             | Amlovar<br>Amlovasc<br>Swivasc<br>Lofra<br>Novasc<br>Amlovasc<br>Amlodipine<br>Asomex<br>Amlosam | Pharmacies         | BP 2003                               | API content, Disintegration, Friability, Hardness, Weight uniformity, Dissolution<br><br><i>UV/Vis spectrophotometry</i>                                        | 3 /10 (33.3%)             |
| Walde 2011 [24]<br>India            | Acetylsalicylic acid                   | Apisafe<br>Caresprin.<br>Ecosporin<br>Nusprin<br>Sprintas                                        | Private pharmacies | Indian Pharmacopeia<br>USP            | API content, Content uniformity, Disintegration, Dissolution, Friability, Hardness, Mass uniformity<br><br><i>Spectrophotometry</i>                             | 1/6 (16.7%)               |
| Olajide, 2011 [25]<br>Nigeria       | Amlodipine                             | Norvasc<br>Amlovasc<br>Amlovar<br>Amlong-10<br>Fepilat<br>Cardiosave-10                          | Retail pharmacies  | USP 2000<br>Chinese Pharmacopeia 2005 | Visual inspection, API Identification, Weight uniformity, Hardness, Friability, Disintegration, Dissolution, API content<br><br><i>UV/Vis spectrophotometry</i> | 4/6 (66.7%)               |
| Oyeniya, 2011 [26]<br>Nigeria       | Amlodipine                             | Generic                                                                                          | Manufacturer       | BP 1998 +<br>BP 2010                  | API content, Disintegration, Dissolution, Friability, Hardness                                                                                                  | 0/5 (0.0%)                |

| Reference / country of collection       | Active pharmaceutical ingredient (API) | Brand name                                     | Outlet                              | Reference standard                         | Test(s) performed and analytical technique for API content/Impurities                                                                      | Failure frequency n/N (%) |
|-----------------------------------------|----------------------------------------|------------------------------------------------|-------------------------------------|--------------------------------------------|--------------------------------------------------------------------------------------------------------------------------------------------|---------------------------|
|                                         |                                        |                                                |                                     |                                            | <i>UV/Vis-Spectrophotometry</i>                                                                                                            |                           |
| Jinat Ashrafi, 2011 [27]<br>Bangladesh  | Atenolol-<br>Amlodipine                | Camlodin®<br>Amlovas®                          | Pharmacy shops                      | BP<br>USP                                  | API content, Content uniformity, Disintegration, Dissolution, Friability, Hardness, Mass uniformity<br><br><i>UV/Vis-Spectrophotometry</i> | 1/4 (25.0%)               |
| T Shams Oishi, 2011[28]<br>Bangladesh   | Atorvastatin                           | Unknown                                        | Local drug stores                   | USP                                        | API content, Disintegration, Dissolution, Friability, Hardness, Thickness, Weight, Diameter<br><br><i>HPLC-UV</i>                          | 6/10 (60.0%)              |
| MNA Ameri, 2011 [29] , unstated country | Simvastatin<br>Nifedipine              | Generic                                        | Unknown                             | BP<br>USP<br>European pharmacopeia         | Dissolution<br><br><i>UV-Vis spectrophotometry</i>                                                                                         | 0/3 (0.0%)                |
| Akinleye M O , 2011 [30]<br>Nigeria     | Amlodipine                             | Generic                                        | Pharmacies                          | BP                                         | API Content, Weight uniformity, Hardness, Friability, Disintegration, Dissolution<br><br><i>UV/Vis spectrophotometry</i>                   | 0/2 (0.0%)                |
| Osadebe P.O, 2011 [31]<br>Nigeria       | Lisinopril                             | Generic                                        | Local pharmacies                    | USP 22<br>BP 2001<br>European pharmacopeia | API content, hardness, friability, weight uniformity, disintegration time and dissolution<br><br><i>UV/Vis spectrophotometry</i>           | 3/3 (100.0%)              |
| Oyetunde, 2012 [32]<br>Nigeria          | Propranolol                            | Generic                                        | Manufacturer locally<br>Wholesaler  | BP 2007                                    | Dissolution, API content<br><br><i>UV/Vis spectrophotometry</i>                                                                            | 0/2 (0.0%)                |
| Giri, 2012 [33]<br>India                | Diltiazem                              | Dilzem CD 90<br>Angizem CD 90<br>Channel CD 90 | Retail pharmacies                   | USP 2000<br>BP                             | API content, dissolution, disintegration and weight variation<br><br><i>UV-spectrophotometry</i>                                           | 0/3 (0.0%)                |
| Walenga, 2012 [34]<br>USA               | Enoxaparin                             | Lovenox                                        | Pharmacy and other hospital systems | Unspecified                                | API content<br><br><i>Anti-Factor Xa assay</i>                                                                                             | 0 /10 (0.0%)              |

| Reference / country of collection    | Active pharmaceutical ingredient (API) | Brand name                                                                                        | Outlet                 | Reference standard  | Test(s) performed and analytical technique for API content/Impurities                                                                      | Failure frequency n/N (%) |
|--------------------------------------|----------------------------------------|---------------------------------------------------------------------------------------------------|------------------------|---------------------|--------------------------------------------------------------------------------------------------------------------------------------------|---------------------------|
| Akinleye, 2012 [35]<br>Nigeria       | Atorvastatin                           | Generic                                                                                           | Registered pharmacy    | USP 2004<br>BP 2007 | API content, Content uniformity, Disintegration, Dissolution, Friability, Hardness, Mass uniformity<br><br><i>HPLC-UV</i>                  | 1/3 (33.3%)               |
| Oyeniya YJ, 2012 [36]<br>Nigeria     | Nifedipine                             | Unknown                                                                                           | Pharmacies             | USP<br>BP 2004      | API content, Content uniformity, Disintegration, Dissolution, Friability, Hardness, Mass uniformity<br><br><i>UV/Vis spectrophotometry</i> | 6/10 (60.0%)              |
| M A Noman, 2012 [37]<br>Yemen        | Captopril                              | Unknown                                                                                           | Retail pharmacies      | BP 2007             | API Content, Weight uniformity, Hardness, Friability, Disintegration, Dissolution<br><br><i>HPLC-UV spectrophotometry</i>                  | 9/15 (60.0%)              |
| Sani Ali. Audu, 2012 [38]<br>Nigeria | Lisinopril                             | Lisiofil<br>Lisoril<br>Lizopril<br>Makinga<br>Ranopril<br>Stripril<br>Takapril<br>Teva<br>Zestril | Unknown                | USP                 | API Content<br><br><i>HPLC-UV</i>                                                                                                          | 4/9 (44.4%)               |
| Chandra Dinda S, 2012 [39]<br>India  | Losartan                               | Generic                                                                                           | Unknown                | Unknown             | API Content<br><br><i>UV/Vis spectrophotometry</i>                                                                                         | 0/6 (0.0%)                |
| S.O. Olayemi, 2012 [40]<br>Nigeria   | Amlodipine                             | Generic                                                                                           | Pharmacies             | BP, USP             | API Content, Weight uniformity, Hardness, Friability, Disintegration, Dissolution<br><br><i>HPLC-UV-PDA</i>                                | 4/8 (50.0%)               |
| Haruna, 2013 [41]<br>Nigeria         | Methyldopa                             | Unknown                                                                                           | 'Pharmaceutical shops' | USP 2000            | API content<br><br><i>Titrimetry</i>                                                                                                       | 1/4 (25.0%)               |

| Reference / country of collection       | Active pharmaceutical ingredient (API) | Brand name                                                                                                           | Outlet                 | Reference standard           | Test(s) performed and analytical technique for API content/Impurities                                                                                       | Failure frequency n/N (%) |
|-----------------------------------------|----------------------------------------|----------------------------------------------------------------------------------------------------------------------|------------------------|------------------------------|-------------------------------------------------------------------------------------------------------------------------------------------------------------|---------------------------|
| Lichanda,B , 2013 [42] China            | Telmisartan                            | Generic                                                                                                              | Unknown                | USP                          | API content, Dissolution, Impurity<br><i>HPLC-UV</i>                                                                                                        | 6 /10(60.0%)              |
| M Antonio de Oliveira, 2014 [43] Brazil | Hydrochlorothiazide                    | Generic                                                                                                              | Compounding pharmacies | Brazilian pharmacopoeia 2010 | API Content, Weight uniformity, Hardness, Friability, Disintegration, Dissolution<br><i>UV-Spectrophotometry</i>                                            | 1/3 (33.3%)               |
| Poonguzhali, 2014 [44] India            | Atenolol                               | Tenolol<br>Ziblok<br>IteI<br>Atecard<br>Tenormin                                                                     | Unknown                | Indian Pharmacopeia          | API content, Disintegration, Friability, Hardness, Weight uniformity, Dissolution,<br><i>HPLC, colorimetry, spectrophotometry</i>                           | 0/5 (0.0%)                |
| Sylvester O. Eraga, 2014 [45] Nigeria   | Amlodipine                             | Amlovar<br>Junvasc<br>Amlovasc<br>Amlodipine<br>Novasc<br>Amlodipine C-T<br>Lofra<br>Amlocard Swivasc – 5<br>Hyercla | Pharmacies             | BP 2007<br>USP 2003          | API content, Disintegration, Dissolution, Friability, Hardness, Thickness, Weight, Diameter<br><i>UV Spectrophotometry</i>                                  | 2/10 (20.0%)              |
| Senthil Rajan, 2014 [46] Malaysia       | Atenolol                               | Generic                                                                                                              | Retail pharmacies      | BP<br>USP                    | Visual inspection, API Identification, Weight uniformity, Hardness, Friability, Disintegration, Dissolution, API content<br><i>UV/Vis spectrophotometry</i> | 0/5 (0.0%)                |
| Safila Naveed, 2014 [47] Pakistan       | Atenolol                               | Tenormin<br>Blokium<br>Atenolol<br>Cardiolyte                                                                        | Unknown                | BP<br>USP                    | Uniformity of weight, friability, hardness, disintegration, dissolution<br><i>UV/Vis spectrophotometry</i>                                                  | 0/4 (0.0%)                |
| Safila Naveed, 2014 [48] Pakistan       | Lisinopril                             | Zestril<br>Trupril<br>Novatec<br>Lame 5                                                                              | Unknown                | BP<br>USP                    | Uniformity of weight, friability, hardness, disintegration, dissolution<br><i>UV/Vis spectrophotometry</i>                                                  | 0/4 (0.0%)                |

| Reference / country of collection     | Active pharmaceutical ingredient (API) | Brand name                                            | Outlet            | Reference standard                     | Test(s) performed and analytical technique for API content/Impurities                                                                            | Failure frequency n/N (%) |
|---------------------------------------|----------------------------------------|-------------------------------------------------------|-------------------|----------------------------------------|--------------------------------------------------------------------------------------------------------------------------------------------------|---------------------------|
| Huma Dilshad, 2014[49] Pakistan       | Captopril                              | Capoten<br>Capril<br>Acetopril<br>Capace              | Unknown           | BP<br>USP                              | Uniformity of weight, friability, hardness, disintegration, dissolution<br><br><i>UV/Vis spectrophotometry</i>                                   | 0/4 (0.0%)                |
| Mahwish Feroz, 2014 [50] Pakistan     | Amlodipine                             | Unknown                                               | Retail pharmacies | USP 2006<br>European Pharmacopeia 2007 | Weight variation, hardness, thickness, length, breadth, friability, disintegration, dissolution and assay<br><br><i>UV spectrophotometry</i>     | 0/6 (0.0%)                |
| Tapas K Pal, 2014 [51] India          | Telmisartan                            | Unknown                                               | Pharmacies        | USP                                    | API content, API identification, Disintegration, Friability, Hardness, Mass uniformity, Visual inspection<br><br><i>UV/Vis spectrophotometry</i> | 2 /6(33.3%)               |
| Han,Y, 2014 [52] Argentina            | Furosemide                             | Generic                                               | Pharmacies        | USP                                    | Dissolution<br><br><i>UV/Vis spectrophotometry</i>                                                                                               | 0/8 (0.0%)                |
| Gamil Q. Othman, 2014 [53] Yemen      | Lisinopril                             | Cipril<br>Lisistril<br>Lotensin<br>zenoril<br>Zestril | Pharmacies        | BP, USP                                | API Content, Weight uniformity, Hardness, Friability, Disintegration, Dissolution<br><br><i>HPLC-UV</i>                                          | 0/5 (0.0%)                |
| Rehana Begum, 2014 [54] Bangladesh    | Losartan                               | Generic                                               | Local drug store  | USP                                    | Dissolution, Hardness, Friability, Disintegration                                                                                                | 0/3 (0.0%)                |
| Sharifa Sultana, 2014 [55] Bangladesh | Furosemide                             | Generic                                               | Unknown           | BP, USP                                | API content, Disintegration, Dissolution, Friability, Hardness, Thickness, Weight, Diameter, Appearance<br><br><i>UV/Vis spectrophotometry</i>   | 1/6 (16.7%)               |
| Basha, 2015 [56] Albania              | Olmesartan                             | Unknown                                               | Pharmacies        | USP 2009                               | API content, Disintegration, Dissolution, Friability, Hardness, Thickness, Weight, Diameter<br><br><i>HPLC-DAD</i>                               | 0/4 (0.0%)                |
| Abdelkarim, 2015 [57] Sudan           | Atenolol                               | Unknown                                               | Unknown           | USP<br>BP 2013                         | API content, Disintegration, Dissolution, Friability, Hardness, Thickness, Weight, Diameter                                                      | 0 /3(0.0%)                |

| Reference / country of collection      | Active pharmaceutical ingredient (API) | Brand name                               | Outlet                            | Reference standard      | Test(s) performed and analytical technique for API content/Impurities                                                                             | Failure frequency n/N (%) |
|----------------------------------------|----------------------------------------|------------------------------------------|-----------------------------------|-------------------------|---------------------------------------------------------------------------------------------------------------------------------------------------|---------------------------|
|                                        |                                        |                                          |                                   |                         | <i>UV/Vis spectrophotometry</i>                                                                                                                   |                           |
| Siaan, 2015 [58]<br>Libya              | Furosemide                             | Duresan®<br><i>Generic</i><br>Furosemide | 'Local market'<br>(not detailed)  | Unspecified             | API content, API identification, Appearance, Content uniformity, Disintegration, Dissolution, Hardness, Mass uniformity<br><br><i>HPLC-UV/Vis</i> | 0/5 (0.0%)                |
| Zhang, 2015 [59]<br>China              | Nifedipine                             | Unknown                                  | Local pharmacies                  | USP 34 2011             | Impurity<br><br><i>HPLC-UV</i>                                                                                                                    | 0/14 (0.0%)               |
| Osei-Asare, 2015 [60]<br>Ghana         | Nifedipine                             | <i>Generic</i>                           | Community and hospital pharmacies | BP 2011<br>USP 2007     | API content, Weight uniformity, Dissolution Test<br><br><i>HPLC-UV</i>                                                                            | 6/12 (50.0%)              |
| G O. Okpanachi, 2015 [61]<br>Nigeria   | Methyldopa                             | Unknown                                  | Unknown                           | BP                      | API content, Disintegration, Dissolution, Friability, Hardness, Thickness, Weight, Diameter<br><br><i>UV- Spectrophotometry</i>                   | 6/8 (75.0%)               |
| Ogochukwu , 2015 [62]<br>Nigeria       | Valsartan                              | Unknown                                  | Registered wholesale              | USP                     | API Content, Weight uniformity, Hardness, Friability, Disintegration, Dissolution<br><br><i>HPLC- UV</i>                                          | 0 /4(0.0%)                |
| T Locatelli, 2015 [63]<br>Brazil       | Propranolol-Hydrochlorothiazide        | <i>Generic</i>                           | Pharmacies                        | Brazilian pharmacopoeia | API Content, Weight uniformity, Hardness, Friability, Disintegration, Dissolution<br><br><i>UV/Vis spectrophotometry</i>                          | 1/6 (16.7%)               |
| Ming-Yuan Zhang, 2015 [64]<br>China    | Nifedipine                             | <i>Generic</i>                           | Unknown                           | USP                     | Impurity, Weight<br><br><i>HPLC-UV</i>                                                                                                            | 0/14 (0.0%)               |
| Md. Abir Khan, 2015 [65]<br>Bangladesh | Atorvastatin                           | <i>Generic</i>                           | Local pharmacies                  | USP                     | API Content, Weight uniformity, Hardness, Friability, Disintegration, Dissolution                                                                 | 2/5 (40.0%)               |

| Reference / country of collection          | Active pharmaceutical ingredient (API) | Brand name                                                                      | Outlet                  | Reference standard         | Test(s) performed and analytical technique for API content/Impurities                                                                        | Failure frequency n/N (%) |
|--------------------------------------------|----------------------------------------|---------------------------------------------------------------------------------|-------------------------|----------------------------|----------------------------------------------------------------------------------------------------------------------------------------------|---------------------------|
|                                            |                                        |                                                                                 |                         |                            | <i>UV/Vis spectrophotometry</i>                                                                                                              |                           |
| Shawahna, 2016 [66]<br>Palestine           | Atorvastatin                           | <i>Generic</i>                                                                  | Local retail pharmacies | USP 2005                   | API content, Hardness<br><br><i>HPLC (unknown detector)</i>                                                                                  | 0/4 (0.0%)                |
| Mansour, 2016 [67]<br>Syrian Arab Republic | Furosemide                             | Unknown                                                                         | Registered pharmacies   | BP<br>USP                  | API Content, Weight uniformity, Hardness, Friability, Disintegration, Dissolution<br><br><i>Spectrophotometry</i>                            | 1/3 (33.3%)               |
| Karmoker , 2016 [68]<br>Bangladesh         | Amlodipine                             | <i>Generic</i>                                                                  | Local drug store        | Unspecified                | API content, Content uniformity, Disintegration, Dissolution, Friability, Hardness, Mass uniformity<br><br><i>UV/Vis spectrophotometry</i>   | 3/4 (50.0%)               |
| Alnuhait, MA , 2016 [69]<br>Saudi Arabia   | Atenolol                               | Tenormin<br>Tenolol<br>Tenol<br>Atormin<br>Apo-Atenol<br>Hypoten<br>Cardol      | Retail pharmacies       | BP 2013                    | API content, Disintegration, Dissolution, Friability, Hardness, Thickness, Weight, Diameter<br><br><i>UV spectrophotometry</i>               | 0/7 (0.0%)                |
| Elghnimi,TY, 2016 [70]<br>Libya            | Simvastatin                            | Simvastatin®<br>Simvastatin-1A<br>Pharma®<br>Vascor®<br>Simvastatina<br>Normon® | Pharmacies              | BP<br>USP                  | Visual inspection, API Identification, Weight uniformity, Hardness, Friability, Disintegration, Dissolution, API content,<br><br><i>HPLC</i> | 0/4 (0.0%)                |
| Hameed A, 2016 [71]<br>Pakistan            | Losartan                               | <i>Generic</i>                                                                  | Unknown                 | BP                         | API content, Disintegration, Dissolution, Friability, Hardness, Thickness, Weight, Diameter<br><br><i>Unstated technique</i>                 | 0/2 (0.0%)                |
| Tapas K Pal, 2016 [72]<br>India            | Rosuvastatin                           | Rozucor<br>Rozumac<br>Rosuvas<br>Zyrova<br>Crestor                              | Unknown                 | USP<br>Indian pharmacopeia | API Content, Weight uniformity, Hardness, Friability, Disintegration, Dissolution<br><br><i>UV/Vis spectrophotometry</i>                     | 2/5 (40.0%)               |

| Reference / country of collection                | Active pharmaceutical ingredient (API) | Brand name     | Outlet                | Reference standard      | Test(s) performed and analytical technique for API content/Impurities                                                                                                                    | Failure frequency n/N (%) |
|--------------------------------------------------|----------------------------------------|----------------|-----------------------|-------------------------|------------------------------------------------------------------------------------------------------------------------------------------------------------------------------------------|---------------------------|
| Nesar, 2017 [73]<br>Pakistan                     | Atenolol                               | <i>Generic</i> | Retail pharmacies     | USP                     | API content, Disintegration, Dissolution, Friability, Hardness, Thickness, Weight, Diameter<br><br><i>UV/Vis spectrophotometry</i><br><i>HPLC</i>                                        | 2/6 (33.3%)               |
| Wajiha, 2017 [74]<br>Pakistan                    | Atorvastatin                           | <i>Generic</i> | Registered pharmacies | USP 2011<br>BP          | API content, Disintegration, Friability, Hardness, Weight uniformity, Dissolution<br><br><i>HPLC-UV</i>                                                                                  | 0/7 (0.0%)                |
| Orfao, 2017 [75]<br>Brazil                       | Hydrochlorothiazide                    | <i>Generic</i> | Unknown               | Brazilian pharmacopoeia | API content, Content uniformity, Disintegration, Dissolution, Friability, Hardness, Mass uniformity<br><br><i>UV/VIS-spectrophotometry</i><br><i>FTIR</i>                                | 1/5 (20.0%)               |
| Mohamed M. Siaan, 2017 [76]<br>Libya             | Atenolol                               | <i>Generic</i> | Manufacturer          | USP<br>BP               | Visual inspection, API Identification, Weight uniformity, Hardness, Friability, Disintegration, Dissolution, Uniformity dosage unit, API content,<br><br><i>UV/Vis spectrophotometry</i> | 0/3 (0.0%)                |
| Mustafa Beesh, 2017 [77]<br>Syrian Arab Republic | Atenolol                               | <i>Generic</i> | Pharmacies            | BP 2009<br>USP 2013     | API content, Content uniformity, Disintegration, Dissolution, Friability, Hardness, Mass uniformity<br><br><i>UV- Spectrophotometry</i>                                                  | 3/4 (75.0%)               |
| A Ali Bassam, 2017 [78]<br>Yemen                 | Clopidogrel                            | <i>Generic</i> | Pharmacies            | USP                     | API content, Content uniformity, Disintegration, Dissolution, Friability, Hardness, Mass uniformity<br><br><i>UV- Spectrophotometry</i>                                                  | 6 /8(75.0%)               |

| Reference / country of collection           | Active pharmaceutical ingredient (API) | Brand name     | Outlet                            | Reference standard       | Test(s) performed and analytical technique for API content/Impurities                                                                  | Failure frequency n/N (%) |
|---------------------------------------------|----------------------------------------|----------------|-----------------------------------|--------------------------|----------------------------------------------------------------------------------------------------------------------------------------|---------------------------|
| C. N. Chinaka , 2017 [79]<br>Nigeria        | Furosemide                             | Unknown        | Pharmacies                        | BP 2012<br>USP 2009      | API Content, Weight uniformity, Hardness, Friability, Disintegration, Dissolution, Packaging<br><br><i>UV/Vis spectrophotometry</i>    | 2/5 (40.0%)               |
| Lovely Z, 2017 [80]<br>Bangladesh           | Clopidogrel                            | Unknown        | Retail pharmacies                 | USP 2013                 | API Content, Weight uniformity, Hardness, Friability, Disintegration, Dissolution<br><br><i>UV spectrophotometry</i>                   | 3 /9(33.3%)               |
| M Isbera, 2017 [81]<br>Syrian Arab Republic | Warfarin                               | Unknown        | Registered pharmacies             | USP                      | API content, Content uniformity, Disintegration, Dissolution, Friability, Hardness, Mass uniformity<br><br><i>UV-spectrophotometry</i> | 1/3 (33.3%)               |
| F Hasin, 2017 [82]<br>Bangladesh            | Valsartan                              | Unknown        | Pharmacies                        | USP                      | API Content, Weight uniformity, Hardness, Friability, Disintegration, Dissolution<br><br><i>HPLC (unknown detector)</i>                | 0/3 (0.0%)                |
| T Tasnim, 2017 [83]<br>Bangladesh           | Olmesartan                             | Unknown        | Retail pharmacies                 | BP 2013<br>USP           | API content, Disintegration, Dissolution, Friability, Hardness, Thickness, Weight, Diameter<br><br><i>UV Spectrophotometry</i>         | 0/9 (0.0%)                |
| H Jung-Cook, 2017 [84]<br>Mexico            | Amlodipine                             | <i>Generic</i> | Unknown                           | USP                      | Dissolution<br><br><i>UV/VIS spectrophotometry</i>                                                                                     | 0/3 (0.0%)                |
| Promit Das, 2018 [85]<br>Bangladesh         | Spironolactone                         | <i>Generic</i> | Pharmacies                        | USP                      | API content, Disintegration, Dissolution, Friability, Hardness, Thickness, Weight, Diameter<br><br><i>UV/Vis spectrophotometry</i>     | 0/6 (0.0%)                |
| Aivalli, 2018 [86]<br>India                 | Atenolol<br>Amlodipine                 | Unknown        | Government and private pharmacies | Indian Pharmacopeia 2014 | API content, API Identification, Dissolution, Impurity, Weight uniformity                                                              | 0/10 (0.0%)               |

| Reference / country of collection              | Active pharmaceutical ingredient (API) | Brand name                                 | Outlet                                       | Reference standard      | Test(s) performed and analytical technique for API content/Impurities                                                                      | Failure frequency n/N (%) |
|------------------------------------------------|----------------------------------------|--------------------------------------------|----------------------------------------------|-------------------------|--------------------------------------------------------------------------------------------------------------------------------------------|---------------------------|
|                                                |                                        |                                            |                                              |                         | <i>HPLC, infrared spectroscopy</i>                                                                                                         |                           |
| Agune, 2018 [87]<br>Ethiopia                   | Nifedipine                             | <i>Generic</i>                             | Retail outlets                               | USP 2013                | Weight Uniformity, Hardness, Disintegration, Dissolution<br><br><i>HPLC (unknown detector)</i>                                             | 2/6 (33.3%)               |
| Mehnaz Ali, 2018 [88]<br>Bangladesh            | Valsartan                              | Unknown                                    | Local drug store                             | USP                     | API content, Disintegration, Dissolution, Friability, Hardness, Thickness, Weight, Diameter<br><br><i>UV/Vis spectrophotometry</i>         | 1/3 (33.3%)               |
| M Rahamathulla, 2018 [89]<br>Saudi Arabia      | Atorvastatin                           | Lipitortm<br>Lorvast<br>Lipomax<br>Astatin | Community pharmacies                         | USP                     | API content, Content uniformity, Disintegration, Dissolution, Friability, Hardness, Mass uniformity<br><br><i>UV/Vis spectrophotometry</i> | 0/4 (0.0%)                |
| Adefolarin A Amu, 2018 [90]<br>Swaziland       | Nifedipine                             | Unknown                                    | Retail pharmacies and central medical stores | USP                     | Weight variation, diameter, hardness, friability, drug content and disintegration<br><br><i>UV spectrophotometry</i>                       | 4/4 (100.0%)              |
| M. A. Varillas, 2018 [91]<br>Argentina         | Hydrochlorothiazide                    | Unknown                                    | Pharmacies                                   | Argentine Pharmacopeia  | API Content, Weight uniformity, Hardness, Friability, Disintegration, Dissolution<br><br><i>UV- spectrophotometry</i>                      | 1/4 (25.0%)               |
| Marques de Andrade, 2018 [92]<br>Brazil        | Verapamil                              | <i>Generic</i>                             | Pharmacies                                   | Brazilian pharmacopoeia | API Content, Weight uniformity, Hardness, Friability, Disintegration, Dissolution<br><br><i>UV/Vis spectrophotometry</i>                   | 0/4 (0.0%)                |
| R F Naddour, 2018 [93]<br>Syrian Arab Republic | Warfarin                               | <i>Generic</i>                             | Unknown                                      | USP BP                  | API Content, Weight uniformity, Hardness, Friability, Disintegration, Dissolution<br><br><i>UV- VIS spectrophotometry</i>                  | 0/8 (0.0%)                |

| Reference / country of collection         | Active pharmaceutical ingredient (API) | Brand name                               | Outlet                | Reference standard             | Test(s) performed and analytical technique for API content/Impurities                                                              | Failure frequency n/N (%) |
|-------------------------------------------|----------------------------------------|------------------------------------------|-----------------------|--------------------------------|------------------------------------------------------------------------------------------------------------------------------------|---------------------------|
| M Gayathri Devi, 2018 [94] India          | Propranolol                            | Pronol<br>Propochem<br>Inderal<br>Ciplar | Unknown               | Indian pharmacopeia<br>USP     | API Content, Weight uniformity, Hardness, Friability, Disintegration, Dissolution<br><br><i>UV/Vis spectrophotometry</i>           | 0/4(0.0%)                 |
| Manal AL-Yosofy, 2018 [95] Sudan          | Amlodipine                             | <i>Generic</i>                           | Registered Pharmacies | USP                            | API content, Disintegration, Dissolution, Friability, Hardness, Thickness, Weight, Diameter<br><br><i>UV/Vis spectrophotometry</i> | 0/2 (0.0%)                |
| Pabitra Thapa, 2018 [96] Nepal            | Amlodipine                             | <i>Generic</i>                           | Unknown               | Indian Pharmacopeia            | API content, Disintegration, Dissolution, Hardness, Weight uniformity<br><br><i>HPLC-UV</i>                                        | 0/11 (0.0%)               |
| M Kumar, 2018 [97] India                  | Enalapril                              | <i>Generic</i>                           | Unknown               | Indian Pharmacopeia            | API Content, Weight uniformity, Hardness, Friability, Disintegration, Dissolution<br><br><i>UV/Vis spectrophotometry</i>           | 0/2 (0.0%)                |
| Sanja Kecman, 2018 [98]                   | Amlodipine                             | <i>Generic</i>                           | Unknown               | European Pharmacopoeia         | API Content, Weight uniformity, Hardness, Friability, Disintegration, Dissolution<br><br><i>HPLC-UV-PDA</i>                        | 0/2 (0.0%)                |
| A Bayoumi, 2019 [99] Iraq                 | Irbesartan                             | Aprovel<br>Converium<br>Gizlan           | Unknown               | USP                            | API Content, Weight uniformity, Hardness, Friability, Disintegration, Dissolution<br><br><i>UV spectrophotometry</i>               | 1/3 (33.3%)               |
| J S Bayasa, 2019 [100] India              | Telmisartan                            | Unknown                                  | Retail pharmacies     | USP<br>Indian pharmacopeia     | API Content, Weight uniformity, Hardness, Friability, Disintegration, Dissolution<br><br><i>UV/Vis spectrophotometry</i>           | 0/4 (0.0%)                |
| Marta I.V. Brevedan, 2019 [101] Argentina | Furosemide                             | <i>Generic</i>                           | Unknown               | Argentine Pharmacopeia,<br>USP | API Content, Weight, Hardness, Friability, Disintegration, Dissolution, Packaging                                                  | 0/7 (0.0%)                |

| Reference / country of collection             | Active pharmaceutical ingredient (API)          | Brand name                                                                                                     | Outlet           | Reference standard | Test(s) performed and analytical technique for API content/Impurities                                                         | Failure frequency n/N (%) |
|-----------------------------------------------|-------------------------------------------------|----------------------------------------------------------------------------------------------------------------|------------------|--------------------|-------------------------------------------------------------------------------------------------------------------------------|---------------------------|
|                                               |                                                 |                                                                                                                |                  |                    | <i>UV spectrophotometry</i>                                                                                                   |                           |
| Arnold C. I, 2019 [102] Nigeria               | Lisinopril                                      | Unknown                                                                                                        | Pharmacies       | BP, USP            | API Content, Weight uniformity, Hardness, Friability, Disintegration, Dissolution<br><br><i>UV/Vis spectrophotometry</i>      | 9/10 (90.0%)              |
| Rehana Begum, 2019 [103] Bangladesh           | Atenolol                                        | <i>Generic</i>                                                                                                 | Unknown          | BP + USP           | Dissolution, Hardness, Friability, Disintegration                                                                             | 0/3 (0.0%)                |
| A S Zaek, 2019 [104] Libya                    | Metoprolol<br>Verapamil<br>Spironolactone       | Aldactone<br>Apo metoprolol<br>Isoptin<br>Lachipres                                                            | Unknown          | BP                 | API Content, Thickness, Hardness and Disintegration time<br><br><i>UV/Vis spectrophotometry</i>                               | 0/6 (0.0%)                |
| K.S. Salako, 2019 [105] Nigeria               | Methyldopa                                      | <i>Generic</i>                                                                                                 | Pharmacies       | BP, USP            | API content, Disintegration, Dissolution, Friability, Hardness, Thickness, Weight, Diameter, Appearance<br><br><i>HPLC-UV</i> | 6/10 (60.0%)              |
| Elias Sakkal, 2019 [106] Syrian Arab Republic | Acetylsalicylic acid<br>Captopril<br>Furosemide | Asiapirin<br>Aspirex<br>Capotal<br>Capoten<br>Captophen<br>Furosemid<br><i>Generic</i><br>Obarsix<br>Rasperine | Pharmacies       | USP                | API content<br><br><i>HPLC-DAD - MS/MS</i>                                                                                    | 0/10 (0.0%)               |
| Maryana S, 2019 [107] Syrian Arab Republic    | Amlodipine                                      | Unknown                                                                                                        | Manufacturers    | USP                | API content, Content uniformity, Disintegration, Dissolution, Friability, Hardness, Weight uniformity<br><br><i>HPLC-UV</i>   | 3/5 (60.0%)               |
| Bilawal Shaikh, 2020 [108] Pakistan           | Captopril                                       | Unknown                                                                                                        | Local pharmacies | USP                | API content, Disintegration, Dissolution, Friability, Hardness, Thickness, Weight, Diameter, Appearance                       | 2/6 (33.3%)               |

| Reference / country of collection             | Active pharmaceutical ingredient (API) | Brand name                              | Outlet             | Reference standard          | Test(s) performed and analytical technique for API content/Impurities                                                                                                                                | Failure frequency n/N (%) |
|-----------------------------------------------|----------------------------------------|-----------------------------------------|--------------------|-----------------------------|------------------------------------------------------------------------------------------------------------------------------------------------------------------------------------------------------|---------------------------|
|                                               |                                        |                                         |                    |                             | <i>HPLC-UV</i>                                                                                                                                                                                       |                           |
| Arnold C. I, 2020 [109] Nigeria               | Amlodipine                             | Unknown                                 | Pharmacies         | BP, USP                     | API Content, Weight uniformity, Hardness, Friability, Disintegration, Dissolution<br><br><i>UV spectrophotometry</i>                                                                                 | 3/10 (30.0%)              |
| Akasha, A, 2020 [110] Libya                   | Amlodipine                             | Amady<br>Amlodipine<br>Amlor            | Unknown            | USP                         | Weight uniformity, Hardness, Friability, Disintegration, Dissolution, Visual inspection<br><br><i>Infrared (IR) spectroscopy</i>                                                                     | 5/5 (100.0%)              |
| D Basava Raju, 2020 [111] India               | Losartan                               | Cosart<br>Losakind<br>Losar             | Retail pharmacies  | USP                         | API content, Dissolution, Friability, Hardness, Thickness, Weight<br><br><i>UV/Vis spectrophotometry</i>                                                                                             | 0/3 (0/0%)                |
| Silvia Farfan, 2020 [112] Argentina           | Clopidogrel                            | <i>Generic</i>                          | Pharmacies         | USP                         | Appearance, Dissolution, Weight variation                                                                                                                                                            | 0/8 (0.0%)                |
| Varghese George, 2020 [113] India             | Clopidogrel                            | Unknown                                 | Unknown            | Indian Pharmacopeia         | API Content<br><br><i>HPLC-UV</i>                                                                                                                                                                    | 8/11 (72.7%)              |
| I Haque, 2020 [114] India                     | Atenolol                               | A-AtenololIP<br>Acord Plus<br>HIPRES-50 | Private pharmacies | Indian Pharmacopeia         | API content, Disintegration, Dissolution, Friability, Hardness, Thickness, Weight<br><br><i>UV/Vis spectrophotometry</i>                                                                             | 0/3 (0.0%)                |
| Mosab Arafat, 2020 [115] United Arab Emirates | Furosemide                             | Lasix<br>Furosemide                     | Pharmacies         | USP , European Pharmacopeia | Comparative compositional analysis (vs authentic or other brands), Weight uniformity, Hardness, Friability, Disintegration, Dissolution<br><br><i>Fourier Transform Infrared Spectrometry (FTIR)</i> | 0/2 (0.0%)                |
| Dalia Gaber, 2020 [116] Saudi Arabia          | Atenolol                               | <i>Generic</i>                          | Pharmacies         | USP                         | API content, Disintegration, Dissolution, Hardness, Weight uniformity                                                                                                                                | 0/4 (0.0%)                |

| Reference / country of collection                                                                                                                                                                                                                                                                                                                      | Active pharmaceutical ingredient (API) | Brand name | Outlet | Reference standard | Test(s) performed and analytical technique for API content/Impurities | Failure frequency n/N (%) |
|--------------------------------------------------------------------------------------------------------------------------------------------------------------------------------------------------------------------------------------------------------------------------------------------------------------------------------------------------------|----------------------------------------|------------|--------|--------------------|-----------------------------------------------------------------------|---------------------------|
|                                                                                                                                                                                                                                                                                                                                                        |                                        |            |        |                    | UV/Vis spectrophotometry                                              |                           |
| HPLC, High-performance liquid chromatography; MS, Mass spectrometry; UV, Ultraviolet; TLC, Thin Layer Chromatography; FTIR, Fourier transformed infrared spectroscopy; LC, Liquid Chromatography; DAD, Diode-Array Detection; PDA, Photo diode array; BP, British Pharmacopeia; USP, United States Pharmacopeia; API, Active Pharmaceutical Ingredient |                                        |            |        |                    |                                                                       |                           |

- 1 Akbuğa J, Gürsoy A. Studies on Furosemide Tablets I Dissolutions of Commercial Products and Different Formulations. *Drug Dev Ind Pharm* 1987;**13**:2199–208. doi:10.3109/03639048709020580
- 2 Sakolkhai S, Chaikyakum A, Aromdee C, *et al.* A Survey on Qualities of Drugs Commercially Available in Thailand. Published Online First: 2010. [https://www.researchgate.net/publication/277206970\\_A\\_Survey\\_on\\_Qualities\\_of\\_Drugs\\_Commercially\\_Available\\_in\\_Thailand](https://www.researchgate.net/publication/277206970_A_Survey_on_Qualities_of_Drugs_Commercially_Available_in_Thailand)
- 3 Nikolić L, Djurić Z, Jovanović M, *et al.* In Vitro Evaluation of Commercial Aspirin Tablets Marketed in Yugoslavia. *Drug Dev Ind Pharm* 1994;**20**:75–83. doi:10.3109/03639049409047215
- 4 Baloglu E. Quality control studies on enalapril maleate tablets available on the turkish drug market. *Ankara Univ Eczac Fak Derg* 2001;**30**:1–16. doi:DOI: 10.1501/Eczfak\_0000000351
- 5 Mayet C. L, Jung-Cook H, Mendoza A. O, *et al.* A Comparative Study on the Dissolution Profiles of Commercial Hydrochlorothiazide Tablets. *Rev Mex Ciencias Farm* 2008;**39**:18–24.
- 6 Gomez Y, Adams E. Analysis of purity in 19 drug product tablets containing clopidogrel: 18 copies versus the original brand. *J Pharm Biomed Anal* 2004;**34**:341–8. doi:10.1016/S0731-7085(03)00533-8
- 7 Petersen K-U. In vitro Release of Felodipine from Original Brand and Generic Products. *Arzneimittelforschung* 2011;**53**:40–3. doi:10.1055/s-0031-1297068
- 8 Longstaff C, Thelwell C, Whitton C. The poor quality of streptokinase products in use in developing countries. *J Thromb Haemost* 2005;**3**:1092–3. doi:10.1111/j.1538-7836.2005.01271.x
- 9 Dires T. A comparative in vitro evaluation of anti hypertensive drugs products (methyldopa, furosemide and propranolol tablets) from local market, Addis Ababa. 2005. <http://etd.aau.edu.et/bitstream/handle/123456789/4895/TeshomeDires.pdf?sequence=1&isAllowed=y>
- 10 Smith J., Tarocco G, Merazzi F, *et al.* Are generic formulations of carvedilol of inferior pharmaceutical quality compared with the branded formulation? *Curr Med Res Opin* 2006;**22**:709–20. doi:http://dx.doi.org/10.1185/030079906X96461
- 11 Hermentin P, Cuesta-Linker T, Weisse J, *et al.* Comparative analysis of the activity and content of different streptokinase preparations. doi:10.1093/eurheartj/ehi219
- 12 Vetchy D, Vetcha M, Rabiškova M, *et al.* Comparison in vitro felodipine release rate from the original versus generic product with controlled release of the drug. *Medicina (B Aires)* 2007;**43**:326. doi:10.3390/medicina43040040
- 13 Panchagnula R, Singh R, Ashokraj Y. In vitro evaluation of modified release formulations of nifedipine from Indian market. *Indian J Pharm Sci*

- 2007;**69**:556. doi:10.4103/0250-474X.36944
- 14 Veronin MA, Nguyen NT. Comparison of Simvastatin Tablets from the US and International Markets Obtained via the Internet. *Ann Pharmacother* 2008;**42**:613–20. doi:10.1345/aph.1K560
  - 15 Lima DM, dos Santos LD, Lima EM. Stability and in vitro release profile of enalapril maleate from different commercially available tablets: Possible therapeutic implications. *J Pharm Biomed Anal* 2008;**47**:934–7. doi:10.1016/j.jpba.2008.02.030
  - 16 Angeli DG, Trezza C. Quality and stability of ramipril generics/copies versus reference ramipril (Tritace): A 3-month stability comparative study. *Clin Drug Investig* 2009;**29**:667–76. doi:http://dx.doi.org/10.2165/11315270-000000000-00000
  - 17 De Braekeleer K, Fierens C. Nifedipine preparations on the Belgian Market: A comparative study. *J Pharm Belg* 2009;**64**:141–6. http://ovidsp.ovid.com/ovidweb.cgi?T=JS&PAGE=reference&D=emed11&NEWS=N&AN=358176356
  - 18 Okoye, E I, Iwuagwu, *et al.* Physicochemical equivalence of some brands of Nifedipine retard tablets available in Nigeria. *African J Biotechnol* 2010;**9**:1274–9. doi:10.5897/AJB09.1466
  - 19 Benkovic G, Sokolic M, Cudina B, *et al.* Analysis of purity profiles of generic lisinopril tablets marketed in Croatia. *Coll Antropol* 2013;**37**:601–6. http://hrcaak.srce.hr/file/153953
  - 20 Bunhak E., Stoef P. Physicochemical quality evaluation of acetylsalicylic acid tablets distributed by a basic pharmacy. *Lat Am J Pharm* 2010;**29**:1358–63. http://www.latamjpharm.org/trabajos/29/8/LAJOP\_29\_8\_1\_13\_VZQSY16SD.pdf
  - 21 Patel PA. Commercial Telmisartan Tablets: A Comparative Evaluation with Innovator Brand Micardis. 2010. http://www.ijpsr.info/docs/IJPSR10-01-08-04.pdf (accessed 28 May 2019).
  - 22 Khalaf ab M, Oglah MK, Amar TA. Chemical and biopharmaceutical assay of different brands of frusemide tablets. Mosul University 2011. doi:10.33899/IPHR.2011.49573
  - 23 Eichie F., Arhewoh M., Isesele J. In vitro assessment of quality control parameters of some commercially available generics of amlodipine besylate in Nigerian drug market. *Int J Heal Res* 2011;**4**:57–61. doi:http://dx.doi.org/10.4314/ijhr.v4i1.70437
  - 24 Walde S., Rasala T., Gurunani G. Marketed preparations: Quality evaluation of delayed release aspirin tablet. *Int Res J Pharm* 2011;**2**:90–2. http://www.irjponline.com/admin/php/uploads/vol2/issue4/15.pdf
  - 25 Olajide AS, Chidinma OC, Dennis UE. Comparative Assessment Of The Quality Control Measurements Of Multisource Amlodipine Tablets Marketed In Nigeria. *Int J Biomed Adv Res* 2011;**1**. doi:10.7439/ijbar.v1i4.10
  - 26 Oyeniyi YJ, Acho M. A Comparative Pharmaceutical Evaluation Of Amlodipine (5mg) Tablets Registered In Nigeria By Nafdac, And Marketed By Various Pharmaceutical Companies Nationwide. https://innovareacademics.in/journal/ijpps/Vol3Suppl5/2863.pdf
  - 27 Ashrafi J. Evaluation of the Quality Control Parameters of Two Different Brands of Combined Atenolol (50mg) & Amlodipine (5mg) Tablets Available in Bangladesh. http://dspace.ewubd.edu/bitstream/handle/123456789/1601/Jinat\_Ashrafi .pdf?sequence=1&isAllowed=y (accessed 27 May 2019).
  - 28 Oishi T, Nimmi I, Islam S. Comparative in vitro Bioequivalence Analysis of Some Generic Tablets of Atorvastatin, a BCS Class II Compound. *Bangladesh Pharm J* 2011;**14**:61–6. http://bps-bd.org/journal/volume14/11.pdf

- 29 Al Ameri MN, Nayuni N, Anil Kumar KG, *et al.* The differences between the branded and generic medicines using solid dosage forms: In-vitro dissolution testing. *Results Pharma Sci* 2012;**2**:1–8. doi:10.1016/j.rinphs.2011.12.001
- 30 Akinleye MO, Oyetunde OO, Okpara HE, *et al.* Equivalence Of Two Generic Brands Of Amlodipine Besylate Under Biowaiver Conditions. <https://innovareacademics.in/journal/ijpps/Vol4Issue2/3358.pdf> (accessed 27 May 2019).
- 31 Osadebe P., Uzor P., Enwereji P. Quality Control and Interchangeability of Multisourced Lisinopril Tablets Marketed in Nigeria. 2011. <https://www.semanticscholar.org/paper/Quality-Control-and-Interchangeability-of-Tablets-P.O-Uzor/f2a752fccf3b950431658699385d69faad78c6ec> (accessed 24 Sep 2019).
- 32 Olubukola OO, Fola T, Moshood OA, *et al.* In Vitro Equivalence Studies of Generic Metformin Hydrochloride Tablets and Propranolol Hydrochloride Tablets Under Biowaiver Conditions in Lagos State, Nigeria. *Dissolution Technol* Published Online First: 2012. [http://dissolutiontech.com/DTresour/201211Articles/DT201211\\_A07.pdf](http://dissolutiontech.com/DTresour/201211Articles/DT201211_A07.pdf)
- 33 Giri T., Tandan H., Choudhary C, *et al.* In-vitro evaluation of commercially available sustained release capsule containing Diltiazem hydrochloride. *Int J Pharm Pharm Sci* 2012;**4**:523–6. <http://www.ijppsjournal.com/Vol4Issue3/4311.pdf>
- 34 Walenga J, Jeske W, Hoppensteadt D, *et al.* Comparative studies on branded enoxaparin and a US generic version of enoxaparin. *Clin Appl Thromb* 2013;**19**:261–7. doi:<http://dx.doi.org/10.1177/1076029612463427>
- 35 Akinleye MO, Idris O, Nwachukwu PN, *et al.* Quality of brands of atorvastatin calcium tablets marketed in Lagos , Nigeria. *Int J Pharm Pharmacol* 2012;**1**:1–7.
- 36 Oyeniyi YJ, AYORINDE J. Pharmaceutical Evaluation Of Some Commercial Brands Of Nifedipine (20mg) Sustained Release Tablets, Marketed In Commercial City Of Kano. 2012. <http://ijbpas.com/pdf/1336904153MS IJBPA2012 1091.pdf>
- 37 Noman MA, Albooryhi M, Sayf AA. In-vitro evaluation of Captopril tablets present in Yemen markets. 2019;:10–2.
- 38 Audu SA, Taiwo AE, Waziri FI. Comparative Evaluation Study on Different Brands of Lisinopril Tablet using HPLC and UV Spectrophotometer. *J. Nat. Sci. Res.* 2012. <https://iiste.org/Journals/index.php/JNSR/article/view/2761/2785>
- 39 Chandra Dinda S. A comparative study of three brands of losartan potassium tablets by UV Spectrophotometry. 2012. [https://www.researchgate.net/publication/305378597\\_A\\_comparative\\_study\\_of\\_three\\_brands\\_of\\_losartan\\_potassium\\_tablets\\_by\\_UV\\_Spectrophotometry](https://www.researchgate.net/publication/305378597_A_comparative_study_of_three_brands_of_losartan_potassium_tablets_by_UV_Spectrophotometry)
- 40 Olayemi S, Akinleye M., Awodele E., *et al.* The physicochemical equivalence of eight brands of amlodipine tablets in Lagos, Nigeria. *West Afr. J. Med.* [https://www.researchgate.net/publication/234106441\\_The\\_physicochemical\\_equivalence\\_of\\_eight\\_brands\\_of\\_amlodipine\\_tablets\\_in\\_Lagos\\_Nigeria](https://www.researchgate.net/publication/234106441_The_physicochemical_equivalence_of_eight_brands_of_amlodipine_tablets_in_Lagos_Nigeria)
- 41 Haruna B, Adaku O. Chemical equivalence study on four brands of alpha-methyl dopa. *J Chem Pharm Res* 2013;**5**:356–8. <http://jocpr.com/vol5-iss10-2013/JCPR-2013-5-10-356-358.pdf>
- 42 Lichanda B, Luo M, Wang H, *et al.* A comparative evaluation of the quality of ten generic telmisartan tablets with the brand. 2013;**7**:2043–53. doi:10.5897/AJPP12.1251
- 43 De Oliveira MA, Yoshida MI, Monteiro Da Silva DCG. Quality evaluation of pharmaceutical formulations containing hydrochlorothiazide. *Molecules* 2014;**19**:16824–36. doi:10.3390/molecules191016824

- 44 Poonguzhali S, Anusha K, Mounica T, *et al.* Comparative invitro evaluation of commercial atenolol tablets. *Res J Pharm Biol Chem Sci* 2014;**5**:30–5. [http://www.rjpbcs.com/pdf/2014\\_5\(6\)/\[4\].pdf](http://www.rjpbcs.com/pdf/2014_5(6)/[4].pdf)
- 45 Eraga SO, C.Uzochukwu O, Iwuagwu MA. Pharmaceutical Equivalence of Some Brands of 5 mg Amlodipine Besylate Tablets Available in Southern Nigeria. 2019;**36**:1–5. doi:10.1088/0256-307X/36/3/030302
- 46 Senthil Rajan D, Azizi M, Shanmugham S, *et al.* Comparative Quality Control Evaluation of Atenolol Tablets Marketed in Kuala Lumpur, Malaysia. 2014. [www.sciencedomain.org](http://www.sciencedomain.org) (accessed 27 May 2019).
- 47 Safila N, Dilshad H. Comparitive Study Of Different Brands Of Atenolol Available In Karachi. *Mod Chem Appl* 2014;**02**:4–7.
- 48 Safila N, Dilshad H, Waheed N. Comparative Study of Four Different Brands of Lisinopril Available In Karachi. *Int Res J Pharm* 2014;**5**:374–7.
- 49 Dilshad H, Naveed S, Waheed N. Comparative Study Of Four Different Brands Of Captopril Available In Karachi, Pakistan. *Int Res J Pharm* 2014;**5**:374–7. doi:10.7897/2230-8407.050578
- 50 Feroz MM, Razvi N, Ghayas S, *et al.* Assessment Of Pharmaceutical Quality Control And Equivalence Of Various Brands Of Amlodipine Besylate (5 Mg) Tablets Available In The Pakistani Market Under Biowaiver Conditions. *undefined* Published Online First: 2014. <https://www.semanticscholar.org/paper/ASSESSMENT-OF-PHARMACEUTICAL-QUALITY-CONTROL-AND-OF-Feroz-Razvi/889bb178a3017b8a1b9b2b5b192e6f05727e6729>
- 51 Pal TK, Ghosh U, Panda M. Comparative Bioequivalence Study Of Different Brands Of Telmisartan Tablets Marketed In India By Dissolution Modeling And Quality Control Tests. *Int J Pharm Phytopharm Res*;**6084**.
- 52 Han YK, Laura Simionato D, Calvo RG, *et al.* Comparison of Dissolution Profiles Available in the Argentinian Market of Furosemide Tablets. Published Online First: 2016. doi:10.6000/1927-5951.2016.06.01.1
- 53 Comparative Analysis of Five Brands of Lisinopril Tablets in Yemeni Market. [https://www.researchgate.net/publication/304627984\\_Comparative\\_Analysis\\_of\\_Five\\_Brands\\_of\\_Lisinopril\\_Tablets\\_in\\_Yemeni\\_Market](https://www.researchgate.net/publication/304627984_Comparative_Analysis_of_Five_Brands_of_Lisinopril_Tablets_in_Yemeni_Market) (accessed 18 Nov 2020).
- 54 Begum R, Sultan2 MZ, Rahman A, *et al.* The In Vitro Pharmaceutical Equivalence Studies Of Losartan Tablets Of Different Manufacturers Available In Bangladesh. <https://1library.net/document/download/qorxkn5q#>
- 55 Comparative quality evaluation of different brands of Frusemide tablets available in Bangladeshi market. [https://www.researchgate.net/publication/324274495\\_Comparative\\_quality\\_evaluation\\_of\\_different\\_brands\\_of\\_Frusemide\\_tablets\\_available\\_in\\_Bangladesh\\_market](https://www.researchgate.net/publication/324274495_Comparative_quality_evaluation_of_different_brands_of_Frusemide_tablets_available_in_Bangladesh_market) (accessed 18 Nov 2020).
- 56 Basha B, Malaj L. A comparative study on the quality of different olmesartan tablets available in the albanian market. *Asian J Pharm Clin Res* 2016;**9**:80–3. <http://innovareacademics.in/journals/index.php/ajpcr/article/download/9505/4034>
- 57 Abdelkarim A, Mohammed A, Abdeen M. Assessment of pharmaceutical quality control and in vitro equivalence of various brands of atenolol (100MG) tablets available in sudanese market under biowaiver conditions. *Int J Pharm Sci Res* 2015;**6**:2390–4. doi:<http://dx.doi.org/10.13040/IJPSR.0975-8232.6%286%29.2390-94>
- 58 Siaan MM, Altketik KA, Almarzouki A, *et al.* Evaluation of the Pharmaceutical Quality of Some Furosemide Tablet Brands. 2015;**4**:238–46.

- 59 Zhang M-Y, Zhang J-D, Gao Q, *et al.* Evaluation Procedure for Quality Consistency of Generic Nifedipine Extended-Release Tablets Based on the Impurity Profile. *Am J Anal Chem* 2015;**06**:776–85. doi:10.4236/ajac.2015.69074
- 60 Osei-Asare C, Kipo SL, Ofori-Kwakye K, *et al.* Comparative in vitro dissolution of commercially available sustained release nifedipine tablet brands in the Kumasi Metropolis, Ghana. *J Appl Pharm Sci* 2015;**5**:54–060. doi:10.7324/JAPS.2015.50809
- 61 Okpanachi GO, Musa H, Mohammed Y, *et al.* Assessment Of Physicochemical Properties Of Eight Brands Of Alpha Methyldopa Tablets Marketed In Zaria , Kaduna State, Nigeria. 2019.
- 62 Ogochukwu A, Olubukola O, Moshood A, *et al.* Biowaiver assessment of some commercially available brands of valsartan tablets using. 2015;**26**:1–11.
- 63 Locatelli T, da Silva AK, Sausen TR. Pharmaceutical equivalence of anti-hypertensive tablets distributed by a Brazilian governmental program. *Lat Am J Pharm* 2015;**34**:1601–6.
- 64 Zhang MY, Zhang JD, Gao Q, *et al.* Evaluation Procedure for Quality Consistency of Generic Nifedipine Extended-Release Tablets Based on the Impurity Profile. *scirp.org*[https://www.scirp.org/html/6-2201212\\_59270.htm](https://www.scirp.org/html/6-2201212_59270.htm)
- 65 Comparative in vitro pharmaceutical equivalence studies of different brands of atorvastatin calcium tablets marketed in Bangladesh. <https://1library.net/document/download/zkk4k48z> (accessed 18 Nov 2020).
- 66 Shawahna R, Hroub AK, Abed E, *et al.* Pharmaceutical quality of generic atorvastatin products compared with the innovator product: A need for revising pricing policy in Palestine. *Acta Pol Pharm - Drug Res* 2016;**73**:725–30.[http://www.ptfarm.pl/pub/File/Acta\\_Poloniae/2016/nr\\_3/725.pdf](http://www.ptfarm.pl/pub/File/Acta_Poloniae/2016/nr_3/725.pdf)
- 67 Mansour O, Ismail G, Mostafaisbera M, *et al.* Assessment of physicochemical properties of furosemide (40mg) tablets marketed in Syria. *J Chem Pharm Sci* 2016;**9**:2879–81.
- 68 Karmoker J, Joydhar P, Sarkar S RM. Comparative in vitro evaluation of various commercial brands of amlodipine besylate tablets marketed in Bangladesh. *Asian J Pharm Heal Sci* 2016;**6**:1384–9. doi:[http://www.ajphs.com/journals/02\\_AJPHS\\_Jan-Mar\\_2016\\_738.pdf](http://www.ajphs.com/journals/02_AJPHS_Jan-Mar_2016_738.pdf)
- 69 Alnuhait MA, Guard N, Affairs H, *et al.* In-vitro evaluation of some generic products of atenolol commonly sold in the Saudi market. 2016.
- 70 Elghnimi TY, El-Majri MA, Bennouh R, *et al.* Comparative In-Vitro Evaluation Of Commercial Simvastatin Tablets (20 Mg). *Int. J. Pharm. Sci. Res.* 2016.<http://ijpsr.com/bft-article/comparative-in-vitro-evaluation-of-commercial-simvastatin-tablets-20-mg/?view=fulltext>
- 71 A H, S N, SS A, *et al.* Pharmaceutical Equivalent Study of Losartan Potassium Formulation available in Karachi, Pakistan. *J Bioequiv Availab* 2016;**08**. doi:10.4172/jbb.1000310
- 72 Pal T, Saha D, Maity S. Bioequivalence Modulation With Modified Starch In Orodispersible Tablets In Comparison To Marketed Conventional Tablets Of Rosuvastatin Calcium Bioequivalence Modulation With Modified Starch In Orodispersible Tablets In Comparison To Marketed Conventional. *Eur J Pharm Med Res* · 2016.
- 73 Nesar S, Rahim N, Yousuf RI, *et al.* Evaluation of pharmaceutical quality and bio waiver study of atenolol tablets available in Karachi (Pakistan). *Lat Am J Pharm* 2017;**36**:2007–11.[http://www.latamjpharm.org/trabajos/36/10/LAJOP\\_36\\_10\\_1\\_18\\_NE96561QEP.pdf](http://www.latamjpharm.org/trabajos/36/10/LAJOP_36_10_1_18_NE96561QEP.pdf)
- 74 Iffat W, Shoaib MH, Rahim N, *et al.* Assessment of Pharmaceutical Equivalence of Different Generic Atorvastatin Tablets available in Pakistan. *Lat Am J Pharm* 2017;**36**:2098–104.[http://www.latamjpharm.org/trabajos/36/10/LAJOP\\_36\\_10\\_1\\_31\\_2LG5V0ZWN5.pdf](http://www.latamjpharm.org/trabajos/36/10/LAJOP_36_10_1_31_2LG5V0ZWN5.pdf)

- 75 Órfão MK, Alves JO, Valladão AS, *et al.* Quality Control Of Hydrochlorothiazide Tablets Marketed In Sinop-Mt. *Sci Electron Arch* 2017;**10**.<https://www.ingentaconnect.com/content/doi/23169281/2017/00000010/00000005/art00016>
- 76 Siaan MM, Anwair MAS, Sadek F, *et al.* Comparative in Vitro Evaluations of Different Brands of Atenolol Tablets in Libyan Market. *J Chem Biol Phys Sci* 2018;**7**:857–67. doi:10.24214/jcbps.a.7.4.85767
- 77 Mustafa B, Isbera M, Aboud K, *et al.* Quality Analysis Of Different Marketed Brands Of Atenolol (50 Mg) Available In Syria And Comparing With The Reference Drug. *World J Pharm Res* 2014;**3**:1961–7. doi:10.20959/wjpr201714-9929
- 78 Ali BA, Al-haddad MG, Areqi AA. Comparative Evaluation of Some Commercial Clopidogrel Tablets Available in Yemen. *Maj Farm* 2018;**13**:79–87.<https://jurnal.ugm.ac.id/majalahfarmaseutik/article/view/40917/22797> (accessed 27 May 2019).
- 79 Chinaka CN, Nwachukwu N. Comparative In Vitro Quality Assessment of Five Brands of Furosemide Tablets Marketed in Port Harcourt , Nigeria. 2017.
- 80 Abdul A, Sanjida H, Ik S, *et al.* Comparative In Vitro Quality Evaluation of Some Clopidogrel Tablets, Commercially Available in Bangladesh Drug Market. <https://medwinpublishers.com/BEBABEBA16000117.pdf> (accessed 28 May 2019).
- 81 Isbera M, Aboud K, Haroun M. Quality control of Warfarin Sodium tablets marketed in Syria. *Res J Pharm Technol* 2017;**10**:2119. doi:10.5958/0974-360X.2017.00371.7
- 82 Hasin F. Comparative Bioequivalence Study of Different Brands of Valsartan Tablets Marketed in Bangladesh By Dissolution Modeling and Quality Control Tests. *World J Pharm Pharm Sci* 2017;**11**:2–21. doi:10.20959/wjpps20177-9562
- 83 Tasnim T, Hasan. M. Comparative Quality Evaluation of Different Olmesartan Medoxomil Generic Tablets Marketed in Bangladesh. *Int J Adv Res* 2017;**5**:1403–10. doi:10.21474/ijar01/4852
- 84 Jung-Cook H, Mayet-Cruz L, Girard-Cuesy ME. Comparative in vitro dissolution and in vivo bioavailability of commercial amlodipine tablets. *Trop J Pharm Res* 2018;**17**:1685. doi:10.4314/tjpr.v17i9.1
- 85 Promit Das, Das S, Akhter R, *et al.* Comparative In Vitro Equivalence Evaluation Of Some Spironolactone Generic Tablets, Commercially Available In Bangladesh Drug Market. *Indo Am J Pharm Res* Published Online First: 2017.[https://www.academia.edu/35017673/COMPARATIVE\\_IN\\_VITRO\\_EQUIVALENCE\\_EVALUATION\\_OF\\_SOME\\_SPIRONOLACTONE\\_GENERIC\\_TABLETS\\_COMMERCIALY\\_AVAILABLE\\_IN\\_BANGLADESH\\_DRUG\\_MARKET](https://www.academia.edu/35017673/COMPARATIVE_IN_VITRO_EQUIVALENCE_EVALUATION_OF_SOME_SPIRONOLACTONE_GENERIC_TABLETS_COMMERCIALY_AVAILABLE_IN_BANGLADESH_DRUG_MARKET) (accessed 24 Sep 2019).
- 86 Aivalli PK, Elias MA, Pati MK, *et al.* Perceptions of the quality of generic medicines: implications for trust in public services within the local health system in Tumkur, India. *BMJ Glob Heal* 2017;**2**:e000644. doi:10.1136/bmjgh-2017-000644
- 87 Agune G, Nigatu M, Gabriel T, *et al.* Comparative In Vitro Evaluation Of Different Brands Of Nifedipine 20mg Retard Tablet Products Marketed In Addis Ababa, Ethiopia. *J Drug Deliv Ther* 2018;**8**:1–5. doi:10.22270/jddt.v8i3.1685
- 88 Ali M, Faizah Ali F, Akhter Rita N, *et al.* Comparative in vitro evaluation of some commercial brands of valsartan tablets marketed in Bangladesh. ~ 1068 ~ *Pharma Innov J* 2018;**7**:1068–72.[www.thepharmajournal.com](http://www.thepharmajournal.com) (accessed 27 May 2019).
- 89 Rahamathulla M. Comparative assessment of different marketed brands of atorvastatin tablets in Asir region, Saudi Arabia. Published Online First: 2018. doi:10.15406/mojddt.2018.02.00023

- 90 Amu AA, Masondo B, Lukhele A, *et al.* Assessment of Pharmaceutical Equivalence and In-Vitro Bioequivalence of Four Brands of Commercially Available Nifedipine Tablets in Swaziland. *Mod Appl Bioequiv Availab* 2018;**4**. doi:10.19080/MABB.2018.04.555626
- 91 Varillas MA, Brededan MIV, Vidal NLG. Pharmaceutical equivalence of hydrochlorothiazide tablets in Argentina. *Dissolution Technol* 2018;**25**:22–7. doi:10.14227/DT250418P22
- 92 Marques de Andrade G, Carvalho Ribeiro C, Castro Alves Plank B, *et al.* Pharmaceutical equivalence and comparative dissolution profile studies for coated tablets containing Verapamil hydrochloride. *J Appl Pharm Sci* 2018;**5**:57–71.
- 93 Naddour RF, Kaddar NA. In vitro bioequivalence for three products of warfarin sodium in syrian market. *Res J Pharm Technol* 2018;**11**:532–6. doi:10.5958/0974-360X.2018.00099.9
- 94 Devi MG, Savithri M, Devi U, *et al.* Comparitive In-Vitro Evaluation Of Commercially Available Generic And Branded Propranolol Hydrochloride Immediate Release Tablets. *Int J Pharm DRUG Anal* 2018;**6**:29–34.
- 95 Al-Yosofy M, Al-Domini Y. Assessment Of Pharmaceutical Quality Control And Bioequivalence Of Various Brands Of Amlodipine Besylate 10 Mg Tablets Marketed In Sudan Under Biowaiver Conditions. *www.wjpps.com* 2018;**7**:118. doi:10.20959/wjpps20189-12213
- 96 Thapa P, Manandhar N, Pandeya S. In-Vitro Evaluation of Amlodipine Tablets Available in Nepalese Market. *J Nepal Chem Soc* 2018;**39**:46–52. doi:10.3126/jncs.v39i0.27027
- 97 Kumar M, Tyagi S, Bhatt S, *et al.* Comparative Evaluation of Two Different Marketed Brands of Enalapril maleate. *J Drug Deliv Ther* 2018;**8**:265–8. doi:10.22270/jddt.v8i6-s.2127
- 98 Keeman S, Goločorbin-Kon S, Mikov M. Physicochemical Equivalence Studies of Two Amlodipine Tablet Formulations. *Scr Med (Brno)* 2018;**49**:18–24. doi:10.18575/msrs.sm.e.18.03
- 99 Bayoumi AA. Quality assessment of selected marketed irbesartan 300mg tablets brands in Iraq. 2019;:10–3. doi:10.13140/RG.2.2.19781.50401
- 100 Bayas JS, Cheke RS, Lokhande P, *et al.* The In-vitro studies and evaluation of telmisartan marketed tablets. *J Drug Deliv Ther* 2019;**9**:74–8. doi:10.22270/jddt.v9i1.2267
- 101 Brededan MIV, Varillas MA. Pharmaceutical equivalence and stability of furosemide tablets in Argentina. *Dissolution Technol* 2019;**26**:30–7. doi:http://dx.doi.org/10.14227/DT260419P30
- 102 Igboasoiki AC, Egeolu AP, Amos BG. Quality Assessment of Various Brands of Lisinopril Tablets sold in Uyo Metropolis using UV Spectrophotometry. 2019. [www.nijophasr.com](http://www.nijophasr.com)
- 103 Begum R, Sultan MZ, Chowdhury JA, *et al.* In vitro Pharmaceutical Equivalence Study of Three Brands of Atenolol Tablets Available in Bangladesh. *Dhaka Univ J Pharm Sci* 2019;**18**:43–8. doi:10.3329/dujps.v18i1.41426
- 104 Zaek AS, Benhamed A, Al MA, *et al.* Comparative study of pharmaceutical content of three different cardiovascular system drugs marketed in Tripoli-Libya. 2019. [www.pcbiochemres.com](http://www.pcbiochemres.com)
- 105 Salako KS, Ayininuola O, Badejo R., *et al.* Quantitative assay of ten brands of methyl dopa tablets marketed in Lagos, Nigeria. 2019. doi:DOI:10.4314/JOPHAS.V16I1

- 106 Sakkal E, Bitar Y, And ST-RJ of P, *et al.* Quality control of the active Pharmaceutical ingredients of some Pharmaceutical products prior the termination of their shelf life. *indianjournals.com*<http://www.indianjournals.com/ijor.aspx?target=ijor:rjpt&volume=12&issue=12&article=085>
- 107 Salamah M, Alahmad Y. Assessment and comparison of pharmaceutical equivalence of amlodipine besylate tablets available in Syria under biowaiver conditions. *Res J Pharm Technol* 2020;**13**:1720–4. doi:10.5958/0974-360X.2020.00310.8
- 108 Shaikh B, Ghoto MA, Arain MI, *et al.* Comparative In-vitro Evaluation of Different Captopril Tablet Brands Commercially Available in Sindh, Pakistan. *J Pharm Res Int* 2020;**32**:131–6. doi:10.9734/jpri/2020/v32i2130763
- 109 Igboasoyi AC, Egeolu AP, Edet EM. Quality evaluation and UV spectrophotometric assay of ten brands of amlodipine tablets marketed in Uyo, Nigeria. *Journal* 2020;**17**:60–5. doi:10.4314/jpb.v17i1.10
- 110 Akasha A. A Comparative Study for Evaluation of Five Formulations Of Amlodipine 10 mg Tablets Marketed in Libya. *undefined* Published Online First: 2020.<http://innoriginal.com/index.php/ijjs/article/view/229>
- 111 Evaluation of Different Marketed Brands of Losartan Potassium Tablets: A Comparative Study with Generic Shop Products. [https://www.researchgate.net/publication/344758402\\_Evaluation\\_of\\_Different\\_Marketed\\_Brands\\_of\\_Losartan\\_Potassium\\_Tablets\\_A\\_Comparative\\_Study\\_with\\_Generic\\_Shop\\_Products\\_Corresponding\\_Author](https://www.researchgate.net/publication/344758402_Evaluation_of_Different_Marketed_Brands_of_Losartan_Potassium_Tablets_A_Comparative_Study_with_Generic_Shop_Products_Corresponding_Author) (accessed 18 Nov 2020).
- 112 Silvia F, Marina Marcos V, Octavio F, *et al.* Comparative dissolution and polymorphism study of clopidogrel bisulfate tablets available in Argentine. *J Appl Pharm Sci* Published Online First: October 2020. doi:10.7324/japs.2020.10107
- 113 George V, Mullavelil K, Joseph AT, *et al.* Quantitative analysis, cost comparison, physician, and patient perceptions on generic versus branded clopidogrel bisulfate tablets marketed in Kerala, India. *j-pcs.org*<http://www.j-pcs.org/article.asp?issn=2395-5414;year=2020;volume=6;issue=1;spage=40;epage=46;aulast=George>
- 114 Haque I, Ghosh S, Joshi H, *et al.* Comparison and Evaluation of Freely Supplied Government and Ethically Marketed Antihypertensive Drug (Atenolol). *Drug Des Intellect Prop Int J* Published Online First: 2020. doi:10.32474/DDIPIJ.2020.03.000164
- 115 Arafat M, Fafelelbom K, Sarfraz M, *et al.* Comparison between branded and generic furosemide 40 mg tablets using thermal gravimetric analysis and Fourier transform infrared spectroscopy. *J Pharm Bioallied Sci* 2020;**12**:489. doi:10.4103/jpbs.jpbs\_365\_19
- 116 Gaber D, Abdoun S, Maswadeh H, *et al.* Equivalence study of immediate release tablets of beta blocker drug. *Int J Appl Pharm* 2020;**12**:53–9. doi:10.22159/ijap.2020v12i2.36477
