# Supplementary material for: The quality of medical products for cardiovascular diseases: a gap in global cardiac care
Source: PubMed Central journal article supplement (PMC8442059; doi:10.1136/bmjgh-2021-006523), 2021-09-14
Supplement: bmjgh-2021-006523supp012.pdf [file bmjgh-2021-006523supp012.pdf]

## Supplementary file 12: Recalls and alerts of poor quality sartans due to impurities in 2018, 2019 and 2020

| Continent       | Country       | API                                                | Number of products-Manufacturers                                                                  | No. Batches     | Month & Year | Ref                |
|-----------------|---------------|----------------------------------------------------|---------------------------------------------------------------------------------------------------|-----------------|--------------|--------------------|
| <b>Africa</b>   | Nigeria       | Valsartan                                          | 7 products – Dexcel Pharm Limited<br>Actavis Group PTC EHF                                        | -               | Aug 2018     | [1]                |
|                 | Ghana         | Valsartan                                          | Denk Pharma, Germany                                                                              | -               | Dec 2018     | [2]                |
|                 |               | Valsartan                                          | 2 products from Actavis, United Kingdom,<br>2 products from Torrent Pharmaceuticals Ltd,<br>India | All             | Sep 2018     | [3]                |
|                 | South Africa  | Valsartan                                          | 3 product -Pharma Dynamic company                                                                 | All             | Jul 2018     | [4]                |
| <b>Americas</b> | United States | Valsartan                                          | 8 products from AvKARE, Inc.<br>(Hetero/Camber), Solco Healthcare LLC.<br>(Prinston               | All             | 2019         | [5]                |
|                 |               | Valsartan products                                 | Many companies                                                                                    | 698             | 2019         | [5]                |
|                 |               | Losartan products                                  | Many companies                                                                                    | 445             | 2019         | [5]                |
|                 |               | Irbesartan ,<br>Telmisartan,<br>Olmesatan products | Many companies                                                                                    | 45<br>65<br>7   | 2019         | [5]<br>[6]         |
|                 |               | Valsartan products                                 | Torrent Pharmaceuticals Limited<br>Teva Pharmaceutical USA<br>Aurobindo Pharma Limited            | 119<br>80<br>22 | 2020         | [7]<br>[8]<br>[9]  |
|                 |               | Valsartan products                                 | Camber Pharmaceuticals, Inc                                                                       | All             | 2020         | [10]               |
|                 | Canada        | Valsartan                                          | Many companies                                                                                    | 16              | Jul2018      | [11]               |
|                 |               | Losartan                                           |                                                                                                   | 53              | Nov2018      | [12]               |
|                 |               | Irbesartan                                         |                                                                                                   | 1               |              | [13]               |
|                 | <b>Asia</b>   | India                                              | Losartan,<br>Valsartan,<br>Telmisartan                                                            | Many companies  | 7            | Aug2013<br>Nov2018 |
| Valsartan       |               |                                                    | 2 products –Silom Medical<br>3 products- Unison Laboratories                                      | All             | 2018         | [15]               |
| Thailand        |               | Losartan                                           | 2 product-Berlin Pharmaceutical Industry<br>Company (Lanzaar 50 and 100)                          | 142             | Mar2019      | [16]               |
| Vietnam         |               | Valsartan                                          | 32 products from Vietnam’s companies and 25<br>imported products                                  | All             | Aug 2018     | [17]               |
| Hong-Kong       |               | Valsartan                                          | 5 products- Actavis and HK Medical companies                                                      | -               | July 2018    | [18]               |
| <b>Europe</b>   | Denmark       | Valsartan                                          | 2Care4 Medical Ltd                                                                                | 6               | Jul2018      | [19]               |
|                 |               | Valsartan-<br>HCTZ                                 | Orifarm Group A/SStada Arzneimittel AG                                                            | 20              | Jul2018      | [19]               |
|                 | France        | Irbesartan                                         | Cristers Laboratoire<br>Mylan Pharmaceuticals<br>Zydus Cadila                                     | 17              | 2019         | [20]               |
|                 |               | Irbesartan-<br>HCTZ <sup>a</sup>                   | Arrow Génériques<br>Zydus Cadila                                                                  | 10              | 2019         | [20]               |
|                 | Losartan      | Accord Healthcare                                  | 1                                                                                                 | 2019            | [20]         |                    |

|                          |                   |                                                                |                                 |                 |                 |
|--------------------------|-------------------|----------------------------------------------------------------|---------------------------------|-----------------|-----------------|
|                          | Valsartan-ALP     | Teva pharmaceutical, France                                    | 59                              | 2019            | [20]            |
| United Kingdom           | Valsartan         | 5 products-Mylan company                                       | All                             | 2018            | [21]            |
|                          |                   | 3 products-DEXCEL PHARMA LIMITED                               | batches                         |                 | [22]            |
|                          |                   | 4 products- ACTAVIS GROUP PTC EHF<br>Teva UK Limited           |                                 |                 |                 |
|                          | Valsartan-HCTZ    | 1 product- ACTAVIS GROUP PTC EHF<br>3 products-Teva UK Limited | All<br>batches<br>21<br>batches | Nov2018         | [23]            |
|                          | Irbesartan        | Actavis Group PTC EHF                                          | 2 batches                       | Jan-Feb<br>2019 | [24]            |
|                          |                   | Macleods Pharma UK Limited                                     | 3 batches                       |                 | [25]            |
|                          | Irbesartan-HTCZ   | Actavis Group PTC EHF                                          | 5 batches                       |                 | [26]            |
|                          | Losartan          | Accord Healthcare Limited                                      | 3 batches                       | Mar2019         | [27]            |
| <b>Multicoun<br/>try</b> | 24<br>countries * | Valsartan                                                      | Unstated                        | 2300<br>batches | Jul2018<br>[28] |

\* *Germany, Norway, Finland, Sweden, Hungary, The Netherlands, Austria, Ireland, Bulgaria, Italy, Spain, Portugal, Belgium, France, Poland, Croatia, Lithuania, Greece, Canada, Bosnia and Herzegovina, Bahrain, and Malta*

## REFERENCES

- 1 Nigeria Government. Recall Of Valsartan Due To Contamination. *NAFDAC* Published Online First: 2018.<https://www.nafdac.gov.ng/recall-of-valsartan-due-to-contamination/>
- 2 Ghana FDA. Recall of Amlodipine/Valsartan combination tablets due to contamination with an impurity (N-Nitroso-Dimethylamine). *Ghana FDA* Published Online First: 2018.[https://fdaghana.gov.gh/images/stories/pdfs/Dear Healthcare Prof/2018/18-398-recall of amlodipine valsartan comb tab-dhpl0001.pdf](https://fdaghana.gov.gh/images/stories/pdfs/Dear%20Healthcare%20Prof/2018/18-398-recall%20of%20amlodipine%20valsartan%20comb%20tab-dhpl0001.pdf) (accessed 25 Sep 2019).
- 3 Ghana Government. RECALLED PRODUCTS SINCE JANUARY 2018. *Ghana FDA* Published Online First: 2019.<https://fdaghana.gov.gh/index.php/recalled-products-since-january-2018/>
- 4 SAHPRA. Recommendations about the urgent Recall of Valsartan In Response to the Potential Risk of Cancer. *South African Heal Prod Regul Auth* Published Online First: 2018.<http://www.health.gov.za/index.php/2014-03-17-09-48-36/2014-03-17-09-49-50?download=2853:press-release-recommendations-about-the-urgent-recall-of-valsartan-in-response-to-the-potential-risk-of-cancer>
- 5 USFDA. FDA Updates and Press Announcements on Angiotensin II Receptor Blocker (ARB) Recalls (Valsartan, Losartan, and Irbesartan). 2019.<https://www.fda.gov/drugs/drug-safety-and-availability/fda-updates-and-press-announcements-angiotensin-ii-receptor-blocker-arb-recalls-valsartan-losartan> (accessed 4 Jun 2019).
- 6 Enforcement Report US Food and Drug Administration Recall Information Search. [https://www.accessdata.fda.gov/scripts/ires/index.cfm#tabNav\\_advancedSearch](https://www.accessdata.fda.gov/scripts/ires/index.cfm#tabNav_advancedSearch) (accessed 16 Sep 2019).
- 7 USFDA. Updated:additional lots added Torrent Pharmaceuticals Limited Issues Voluntary Nationwide Recall of Valsartan/Amlodipine/HCTZ, Valsartan/Amlodipine and Valsartan Tablets | FDA. 2020.<https://www.fda.gov/safety/recalls-market-withdrawals-safety-alerts/updatedadditional-lots-added-torrent-pharmaceuticals-limited-issues-voluntary-nationwide-recall> (accessed 12 Dec 2020).
- 8 USFDA. Teva Pharmaceuticals USA Issues Voluntary Nationwide Recall of Valsartan and Valsartan Hydrochlorothiazide Tablets | FDA. 2020.<https://www.fda.gov/safety/recalls-market-withdrawals-safety->

- alerts/teva-pharmaceuticals-usa-issues-voluntary-nationwide-recall-valsartan-and-valsartan (accessed 12 Dec 2020).
- 9 USFDA. Aurobindo Pharma Limited Issues Voluntary Recall of Irbesartan Drug Substance Due to the Detection of Trace Amounts of NDEA (NNitrosodiethylamine) Impurity Found in the Active Pharmaceutical Ingredient (API) | FDA. 2020.<https://www.fda.gov/safety/recalls-market-withdrawals-safety-alerts/aurobindo-pharma-limited-issues-voluntary-recall-irbesartan-drug-substance-due-detection-trace> (accessed 12 Dec 2020).
  - 10 USFDA. Camber Pharmaceuticals, Inc. Issues Voluntary Nationwide Recall of Valsartan Tablets, USP, 40mg, 80mg, 160mg and 320mg Due to The Detection of Trace Amounts of N-Nitrosodimethylamine (NDMA) Impurity, Found in an Active Pharmaceutical Ingredient (API) | FD. 2020.<https://www.fda.gov/safety/recalls-market-withdrawals-safety-alerts/camber-pharmaceuticals-inc-issues-voluntary-nationwide-recall-valsartan-tablets-usp-40mg-80mg-160mg> (accessed 16 Dec 2020).
  - 11 Canada Government. Information Update - Mylan-Valsartan medications voluntarily recalled as a precaution due to an impurity. Heal. Canada. 2018.<https://www.newswire.ca/news-releases/information-update---mylan-valsartan-medications-voluntarily-recalled-as-a-precaution-due-to-an-impurity-701503141.html> (accessed 16 Sep 2019).
  - 12 Health Canada. Pro Doc Limitée voluntarily recalls two lots of irbesartan drugs because of nitrosamine impurity - Recalls and safety alerts. <https://healthycanadians.gc.ca/recall-alert-rappel-avis/hc-sc/2019/69328a-eng.php> (accessed 16 Sep 2019).
  - 13 Canada Government. Multiple Losartan-containing drugs voluntarily recalled because of potential for nitrosamine impurity. *Heal Canada* Published Online First: 2018.<http://www.healthycanadians.gc.ca/recall-alert-rappel-avis/hc-sc/2019/69272a-eng.php>
  - 14 Alerts. <https://cdsco.gov.in/opencms/opencms/en/Notifications/Alerts/> (accessed 4 Sep 2019).
  - 15 Thailand Government. Thailand is First Asian Country to “ Recall Valsartan ” Over Potential Links to Cancer. Published Online First: 2018.<https://www.chiangraitimes.com/thailand-is-first-asian-country-to-recall-valsartan-over-potential-links-to-cancer.html>
  - 16 Thailand Government. FDA recalls Lanzaar 50 and Lanzaar 100 over cancer fears. *Nation Thail Portal* Published Online First: 2019.<https://www.nationthailand.com/national/30365885>
  - 17 Vietnam Government. Vietnam recalls 57 heart drugs with cancer-causing substance. *Vnexpress* Published Online First: 2018.<https://e.vnexpress.net/news/news/vietnam-recalls-57-heart-drugs-with-cancer-causing-substance-3787277.html>
  - 18 Hong Kong Government. Recall of five valsartan-containing pharmaceutical products. *Gov Hong Kong Spec Adm Reg* Published Online First: 2018.<https://www.info.gov.hk/gia/general/201807/06/P2018070600841.htm>
  - 19 Denmark Government . Recall of valsartan blood pressure medicine. *Danish Med Agency* Published Online First: 2018.<https://laegemiddelstyrelsen.dk/en/news/2018/recall-of-valsartan-blood-pressure-medicine>
  - 20 Rappel de lots de médicaments à base d’irbésartan - Point d’Information. ANSM. 2019.<https://ansm.sante.fr/S-informer/Points-d-information-Points-d-information/Rappel-de-lots-de-medicaments-a-base-d-irbesartan-Point-d-Information> (accessed 10 Jun 2019).
  - 21 UK Government. Class 2 Medicines Recall: Teva UK Limited and Mylan - recall of some Valsartan containing products. GOV.UK. 2018.<https://www.gov.uk/drug-device-alerts/class-2-medicines-recall-teva-uk-limited-and-mylan-recall-of-some-valsartan-containing-products> (accessed 25 Sep 2019).
  - 22 UK Government. Class 1 Medicines Recall: Action Now – including out of hours Pharmacy Level Recall.

- GOV.UK. 2018.<https://www.gov.uk/drug-device-alerts/class-1-medicines-recall-action-now-including-out-of-hours-pharmacy-level-recall> (accessed 25 Sep 2019).
- 23 Class 1 Medicines Recall. <https://www.gov.uk/drug-device-alerts/class-1-medicines-recall-action-now-including-out-of-hours-pharmacy-level-recall> (accessed 4 Sep 2019).
- 24 UK Government. Class 2 Medicines Recall: Actavis Group PTC EHF - recall of batches of Irbesartan/Hydrochlorothiazide 300/12.5mg Film-coated Tablets and Irbesartan/Hydrochlorothiazide 150/12.5mg Film-coated Tablets - GOV.UK. Med. Healthc. Prod. Regul. Agency UK. 2019.<https://www.gov.uk/drug-device-alerts/class-2-medicines-recall-actavis-group-ptc-ehf-recall-of-batches-of-irbesartan-hydrochlorothiazide-300-12-5mg-film-coated-tablets-and-irbesartan-hydrochlorothiazide-150-12-5mg-film-coated-tablets> (accessed 25 Sep 2019).
- 25 UK Government. Class 2 Medicines recall: Irbesartan and Irbesartan / Hydrochlorothiazide. *Med Healthc Prod Regul Agency UK* Published Online First: 2019.[https://assets.publishing.service.gov.uk/media/5c62f395e5274a317cc0ebc3/EL\\_19\\_A04-Final.pdf](https://assets.publishing.service.gov.uk/media/5c62f395e5274a317cc0ebc3/EL_19_A04-Final.pdf) (accessed 25 Sep 2019).
- 26 UK Government. Class 2 Medicines Recall: Macleods Pharma UK Limited - Irbesartan 150mg Film-coated tablets, PL 34771/0079 (MDR 94-06/18). Med. Healthc. Prod. Regul. Agency UK. 2019.<https://www.gov.uk/drug-device-alerts/class-2-medicines-recall-macleods-pharma-uk-limited-irbesartan-150mg-film-coated-tablets-pl-34771-0079-mdr-94-06-18> (accessed 25 Sep 2019).
- 27 UK Government. Class 2 Medicines recall: Accord Healthcare Limited - Losartan Potassium 50mg Film-coated Tablets, PL 20075/0022 and Losartan Potassium 100mg Film-coated Tablets, PL 20075/0023 - GOV.UK. Med. Healthc. Prod. Regul. Agency UK. 2019.<https://www.gov.uk/drug-device-alerts/class-2-medicines-recall-accord-healthcare-limited-losartan-potassium-50mg-film-coated-tablets-pl-20075-0022-and-losartan-potassium-100mg-film-coated-tablets-pl-20075-0023> (accessed 25 Sep 2019).
- 28 Farrukh M, Tariq M, Malik O, *et al*. Valsartan recall: global regulatory overview and future challenges. *Ther Adv Drug Saf* 2019;**10**:204209861882345. doi:<http://dx.doi.org/10.1177/2042098618823458>
