# Supplementary material for: The quality of medical products for cardiovascular diseases: a gap in global cardiac care
Source: PubMed Central journal article supplement (PMC8442059; doi:10.1136/bmjgh-2021-006523), 2021-09-14

**Supplementary file 14: PRISMA flow diagram of the selection process of the publications on cardiovascular medical devices quality**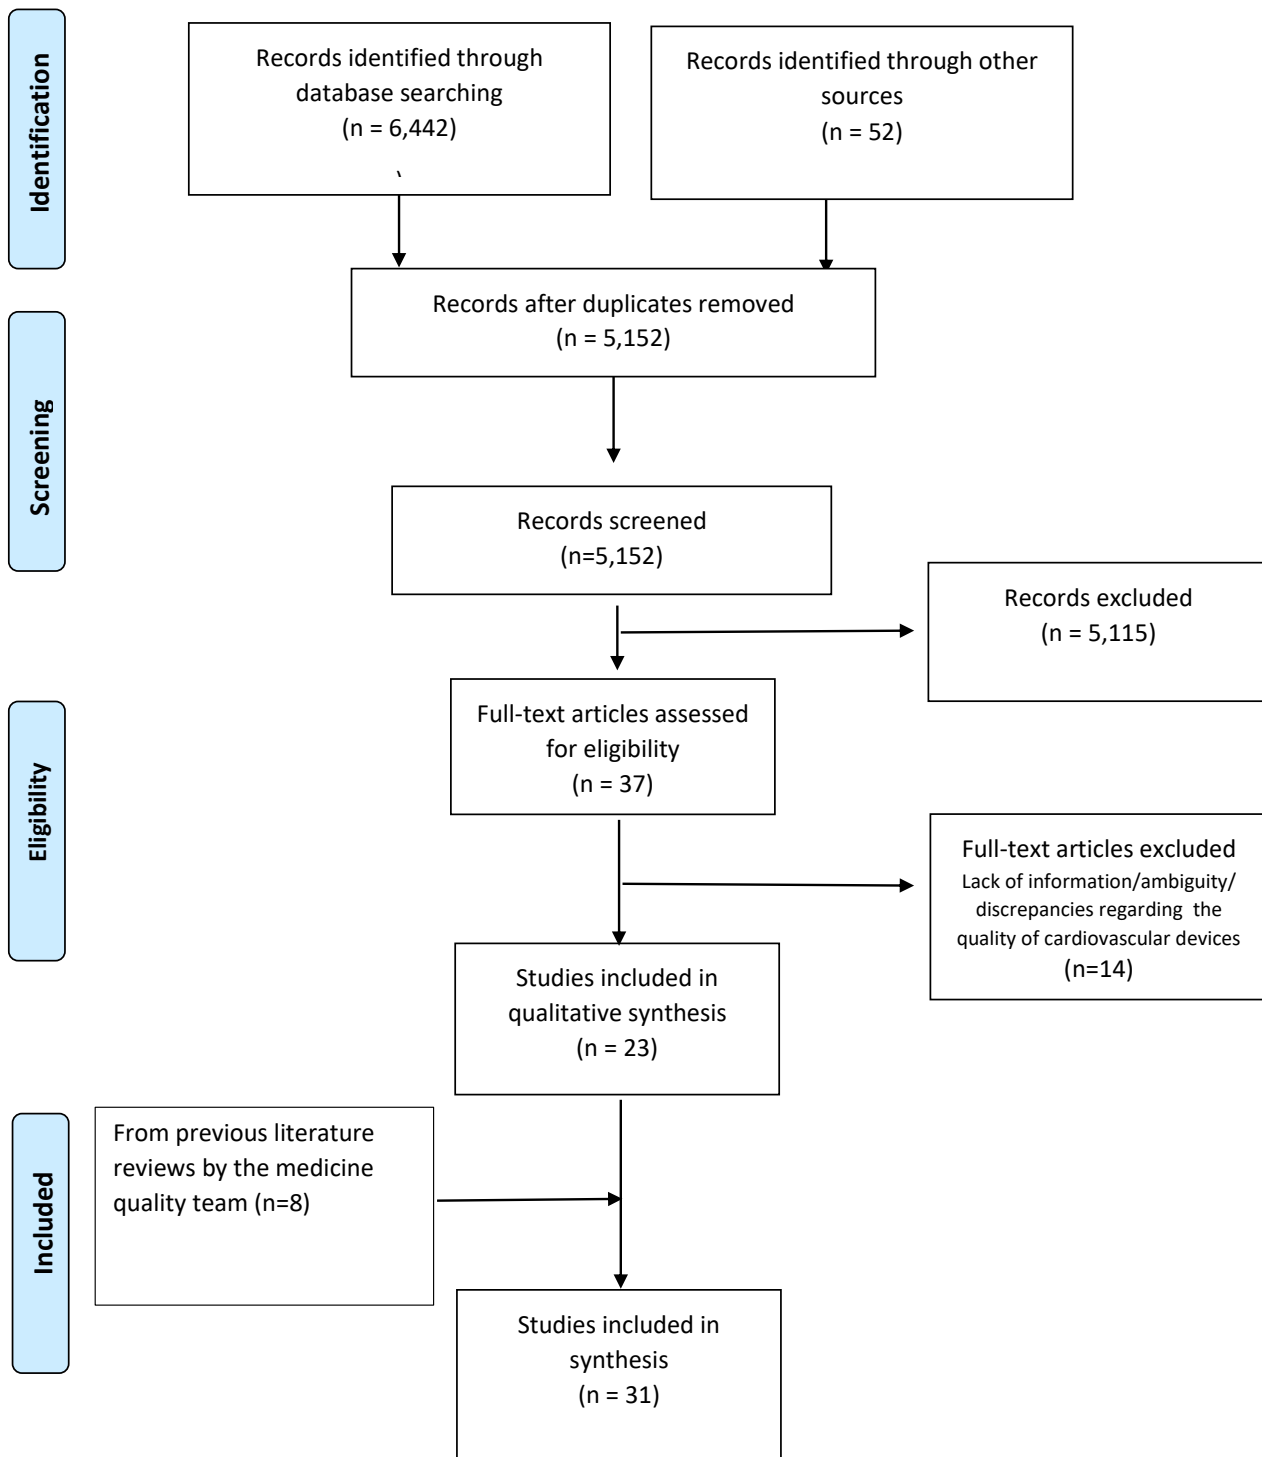

Supplement: bmjgh-2021-006523supp014.pdf [file bmjgh-2021-006523supp014.pdf]
