# Supplementary material for: The quality of medical products for cardiovascular diseases: a gap in global cardiac care
Source: PubMed Central journal article supplement (PMC8442059; doi:10.1136/bmjgh-2021-006523), 2021-09-14
Supplement: bmjgh-2021-006523supp016.pdf [file bmjgh-2021-006523supp016.pdf]

**Supplementary file 16. Other articles on cardiovascular medicines quality included in the review**

| <b>Title</b>                                                                                                                                          | <b>First author</b>        | <b>Year</b> |
|-------------------------------------------------------------------------------------------------------------------------------------------------------|----------------------------|-------------|
| Aspirin-A National Survey I: Semiautomated Determination of Aspirin in Bulk and Tablet Formulations and Salicylic Acid in Tablet Formulations [1]     | William E. Juhl            | 1979        |
| Monitoring the Purity of Pharmaceutical Heparin Preparations by High-Field 1H-Nuclear Magnetic Resonance Spectroscopy [2]                             | Neville, George A          | 1988        |
| Drug Quality Control Work in DARU: Observations during 1983-1986 [3]                                                                                  | Kibwage, I.O.              | 1992        |
| Quality Control of Pharmaceuticals In The Caribbean [4]                                                                                               | Dennis.P                   | 1992        |
| Drug Quality Control Work in Drug Analysis and Research Unit: Observation During 1991-1995 [5]                                                        | Kibwage, I.O.              | 1999        |
| Drug Quality Control in Kenya: Observation in Drug Analysis and Research Unit during the Period 1996-2000 [6]                                         | Thoithi, G.N.              | 2002        |
| Magic Bullet Gone Astray: provides guidance to organizations for implementing effective anti-counterfeiting policies Medications and the Internet [7] | Michael A.Veronin          | 2004        |
| Mongolia Pharmaceutical Sector Assessment Report [8]                                                                                                  | Salik Govind               | 2004        |
| Substandard life-saving drugs: a global concern [9]                                                                                                   | Andreotti, F               | 2005        |
| UV spectrophotometric determination of clopidogrel and repaglinide [10]                                                                               | Sankar, D. G.              | 2005        |
| Étude de la qualité des médicaments génériques DCI achetés par la Pharmacie Populaire du Mali dans le cadre des appels d'offres de 2002 à 2005 [11]   | Issiaka C                  | 2006        |
| Monitoring of simvastatin impurities by HPLC with microemulsion eluents [12]                                                                          | Malenovic,A                | 2006        |
| Amlodipine besilate screening in pharmaceutical preparations by CE [13]                                                                               | P Jankovics                | 2008        |
| Contaminated heparin preparations, severe adverse events and the contact system [14]                                                                  | Ramacciotti, E             | 2008        |
| Contaminated heparin products recalled [15]                                                                                                           | WHO Drug information       | 2008        |
| Drug Quality Control in Kenya: Observation in the Drug Analysis and Research Unit During the Period 2001-2005 [16]                                    | Thoithi.G.N                | 2008        |
| Heparin quality control in the Brazilian market: implications in the cardiovascular surgery [17]                                                      | MELO, E                    | 2008        |
| Les heparines contaminees [18]                                                                                                                        | Monneret, C                | 2008        |
| UK Government action on counterfeit medicines [19]                                                                                                    | The pharmaceutical journal | 2008        |
| Analysis of pharmaceutical heparins and potential contaminants using 1H-NMR and PAGE [20]                                                             | Zhang, Z                   | 2009        |
| Comparative stability of repackaged metoprolol tartrate tablets [21]                                                                                  | Y Yang                     | 2009        |
| Counterfeit Drugs: Coming to a Pharmacy Near You with an Update for 2009 [22]                                                                         | Yankus. W                  | 2009        |
| Identifying Counterfeit Medicines Using near Infrared Spectroscopy [23]                                                                               | Moffat, AC                 | 2009        |
| Quality of medicines stored together in multi-compartment compliance aids [24]                                                                        | P. Donyai                  | 2009        |
| Raids uncover counterfeit drugs [25]                                                                                                                  | Sagita, Dessy              | 2009        |
| Comparison of established and novel purity tests for the quality control of heparin by means of a set of 177 heparin samples [26]                     | Alban,S                    | 2010        |
| Composition of OSCS-contaminated heparin occurring in 2008 in batches on the German market [27]                                                       | T. Beyer                   | 2010        |
| Los medicamentos falsificados en Peru [28]                                                                                                            | Moreno Exebio,LE           | 2010        |
| Post Marketing Surveillance on Propranolol and Atenolol Tablets Manufactured in Iran [29]                                                             | Khabnadideh,S              | 2010        |

| Title                                                                                                                                                                                                                              | First author          | Year |
|------------------------------------------------------------------------------------------------------------------------------------------------------------------------------------------------------------------------------------|-----------------------|------|
| Tablet splitting: Product quality assessment of metoprolol succinate extended release tablets [30]                                                                                                                                 | Na Zhao               | 2010 |
| Contaminants in heparin: Review of the literature, molecular profiling, and clinical implications [31]                                                                                                                             | Eduardo Ramacciotti   | 2011 |
| In vitro-in vivo correlation of four commercial brands of aspirin tablets marketed in Nigeria [32]                                                                                                                                 | Bamigbola E. A        | 2011 |
| Simple fluorescence assay for quantification of OSCS in heparin. [33]                                                                                                                                                              | Luhn, S               | 2011 |
| Unveiling the Mystery of Online Pharmacies: an Audit Study [34]                                                                                                                                                                    | Bate, R.              | 2012 |
| Atorvastatin Generics Obtained from Multiple Sources Worldwide Contain a Methylated Impurity that Reduces Their HMG-CoA Reductase Inhibitory Effects [35]                                                                          | Richard Preston Mason | 2013 |
| Characterization of currently marketed heparin products: Key tests for LMWH quality assurance [36]                                                                                                                                 | Hongping Ye           | 2013 |
| In vitro studies of amlodipine besylate tablet and comparison with foreign brand leader in Nepal [37]                                                                                                                              | Tekendra Pant         | 2013 |
| Liquid dosage forms extemporaneously prepared from commercially available products - considering new evidence on stability [38]                                                                                                    | Haywood, A.           | 2013 |
| Quality Performance of Drugs Analyzed in the Drug Analysis and Research Unit (DARU) during the Period 2006-2010 [39]                                                                                                               | Abuga K.O.            | 2013 |
| RP-LC simultaneous quantitation of co-administered drugs for (non-insulin dependent) diabetic mellitus induced dyslipidemia in active pharmaceutical ingredient, pharmaceutical formulations and human serum with UV-detector [40] | Arayne, M             | 2013 |
| Substandard drugs: A potential crisis for public health [41]                                                                                                                                                                       | Johnston,A            | 2013 |
| A systematic review of counterfeit and substandard medicines in field quality surveys [42]                                                                                                                                         | Abdulaziz, A.F.       | 2014 |
| Chromatographic determination of clopidogrel bisulfate; detection and quantification of counterfeit Plavix tablets [43]                                                                                                            | Mona E. ElTantawy     | 2014 |
| Degradation study of different brands of amlodipine using UV spectrophotometer [44]                                                                                                                                                | Naveed, S             | 2014 |
| Development and validation of HPLC dissolution assay of simvastatin tablets under normal and accelerated conditions [45]                                                                                                           | EL Karbanea,M         | 2014 |
| Evaluation of the Pharmaceutical Characteristics of Various Enteric-Coated Aspirin Tablets under Different Storage Conditions [46]                                                                                                 | Abe,T                 | 2014 |
| Liquid chromatography with tandem mass spectrometry for the simultaneous identification and quantification of cardiovascular drugs applied to the detection of substandard and falsified drugs [47]                                | M Bernard             | 2014 |
| Quality and Availability of Medicines in Public Health Facilities of Kerala, Indian State an Analysis [48]                                                                                                                         | Lekshmi. S            | 2014 |
| Recent Applications of Analytical techniques for counterfeit drug analysis: A Review [49]                                                                                                                                          | Kumar, R.             | 2014 |
| Drug Quality: Postmarket Sampling and Testing Results for Drugs (FY 2015) [50]                                                                                                                                                     | US FDA                | 2015 |
| Surveillance of Quality of Medicines Available in the Nepalese Market: A Study from Kathmandu Valley [51]                                                                                                                          | Gyanwali, P.          | 2015 |
| In vitro and in vivo postmarketing surveillance of valsartan, alone or in combination with amlodipine or hydrochlorothiazide, among Palestinian hypertensive patients [52]                                                         | Zaid,N.A              | 2016 |
| National Drug Survey - The Core Expert Committee [53]                                                                                                                                                                              | Surinder Singh        | 2016 |
| Process validation of tablet containing Irbesartan 300mg and Hydrochlorothiazide 12.5mg [54]                                                                                                                                       | Z Hussain             | 2016 |
| Drug Quality: Postmarket Sampling and Testing Results for Drugs (FY 2016) [55]                                                                                                                                                     | US FDA                | 2017 |
| Identification of Substandard Medicines via Disproportionality Analysis of Individual Case Safety Reports.[56]                                                                                                                     | Trippe, Z. A.         | 2017 |
| Investigations Of The Quality Medicines Distributed In Myanmar And Cambodia, Through Different Surveys [57]                                                                                                                        | Islam, R.             | 2017 |

| Title                                                                                                                                                                                                                                                                                                             | First author       | Year |
|-------------------------------------------------------------------------------------------------------------------------------------------------------------------------------------------------------------------------------------------------------------------------------------------------------------------|--------------------|------|
| Poor-Quality and Counterfeit Drugs: A Systematic Assessment of Prevalence and Risks Based on Data Published From 2007 to 2016. [58]                                                                                                                                                                               | Koczwara, A.       | 2017 |
| A Study on Spurious and Not of Standard Quality Drugs in the State of Andhra Pradesh [59]                                                                                                                                                                                                                         | Praveen Kumar G    | 2018 |
| After Valsartan Recalls, Regulators Grapple with Nitrosamine Contamination in APIs [60]                                                                                                                                                                                                                           | Shanley A          | 2018 |
| Comparison of uv spectrophotometry and hplc methods for the determination of pharmaceutical equivalence of clopidogrel tablet brands marketed in Nigeria [61]                                                                                                                                                     | S. E. Ukwueze      | 2018 |
| Development and validation of a hydrophilic interaction liquid chromatography method for the quantitation of impurities in fixed-dose combination tablets containing rosuvastatin and metformin [62]                                                                                                              | Machairas. G       | 2018 |
| Inorganic analysis of falsified medical products using X-ray fluorescence spectroscopy and chemometrics [63]                                                                                                                                                                                                      | Herve.R            | 2018 |
| NDMA impurity in valsartan and other pharmaceutical products: Analytical methods for the determination of N-nitrosamines [64]                                                                                                                                                                                     | Parr.K.M           | 2018 |
| Regulatory response to contaminated valsartan [65]                                                                                                                                                                                                                                                                | Rita Banzi         | 2018 |
| WHO pharmaceuticals Newsletter No.5 2018 [66]                                                                                                                                                                                                                                                                     | WHO                | 2018 |
| Analysis of an impurity, N-nitrosodimethylamine, in valsartan drug substances and associated products using GC-MS [67]                                                                                                                                                                                            | Tsutsumi.T         | 2019 |
| Current status of angiotensin receptor blocker recalls[68]                                                                                                                                                                                                                                                        | P Moon Gunasekaran | 2019 |
| Development of quantitative HPTLC-densitometry methods following a model process for transfer of TLC screening methods for pharmaceutical products containing moxifloxacin HCl, ofloxacin, amoxicillin trihydrate, acetylsalicylic acid + acetaminophen + caffeine, nimesulide, irbesartan, and pantoprazole [69] | Zeng, B            | 2019 |
| Falsified and substandard cardiovascular drugs in Africa: a need for continued monitoring strategies [70]                                                                                                                                                                                                         | Marie Antignac     | 2019 |
| Low quality of some generic cardiovascular medicinal products represents a matter for growing concern [71]                                                                                                                                                                                                        | Juan Tamargo       | 2019 |
| Public Perception toward E-commerce of Medicines and Comparative Pharmaceutical Quality Assessment Study of Two Different Products of Furosemide Tablets from Community and Illicit Online Pharmacies [72]                                                                                                        | Ashames, A         | 2019 |
| Short commentary on NDMA (N-nitrosodimethylamine) contamination of valsartan products [73]                                                                                                                                                                                                                        | David J. Snodin    | 2019 |
| Defibrotide falsifie et contamine identifie dans les regions de l'OMS de l'Europe, Mediterranee orientale et du Pacifique occidental [74]                                                                                                                                                                         | -1                 | 2020 |
| Substandard, falsified and unregistered medicines in Latin America, 2017-2018 [75]                                                                                                                                                                                                                                | Rojas-Cortes, R.   | 2020 |
| Stability of essential drugs in the field: Results of a study conducted over a two-year period in Burkina Faso [76]                                                                                                                                                                                               | Ballereau.F        | 1997 |

- Juhl WE, Kirchoefer RD. Aspirin—a national survey I: Semiautomated determination of aspirin in bulk and tablet formulations and salicylic acid in tablet formulations. *J Pharm Sci* 1980;**69**:544–8. doi:10.1002/jps.2600690517
- Neville GA, Mori F, Holme KR, *et al.* Monitoring the purity of pharmaceutical heparin preparations by high-field 1H-nuclear magnetic resonance spectroscopy. *J Pharm Sci* 1988;**78**:101–4. doi:http://dx.doi.org/10.1002/jps.2600780205
- Kibwage IO, Ogeto JO, Maitai CK, *et al.* Drug quality control work in Daru: observations during 1983-1986. *East Afr Med J* 1992;**69**:577–80. http://www.ncbi.nlm.nih.gov/pubmed/1473513 (accessed 25 Sep 2019).
- Dennis P, Edgrill L., Allen M. Quality control of pharmaceuticals in the Caribbean. *Int. Pharm. J.* http://ovidsp.ovid.com/ovidweb.cgi?T=JS&PAGE=reference&D=emed4&NEWS=N&AN=22151866 (accessed 25 Sep 2019).

- 5 Kibwage I, JT K, Gathu L, *et al.* Drug Quality Control Work in Drug Analysis and Research Unit: Observation During 1991-1995. Published Online First: 1999.<http://erepository.uonbi.ac.ke/handle/11295/10357?show=full> (accessed 25 Sep 2019).
- 6 Thoithi G, Abuga K, Nguyo J, *et al.* Drug Quality Control in Kenya: Observation in Drug Analysis and Research Unit during the Period 1996-2000. *East Cent African J Pharm Sci* 2004;**5**:28–32. doi:10.4314/ecajps.v5i2.9684
- 7 Veronin MA, Youan B-BC. Magic bullet gone astray: medications and the Internet. *Science (80- )* 2004;**305**:481–2.<https://go.gale.com/ps/anonymou?id=GALE%7CA120350491&sid=googleScholar&v=2.1&it=r&linkaccess=fulltext&issn=00368075&p=AONE&sw=w> (accessed 25 Sep 2019).
- 8 Govind S. Mongolia Pharmaceutical Sector Assessment Report. Published Online First: 2004.<http://apps.who.int/medicinedocs/documents/s18614en/s18614en.pdf> (accessed 25 Sep 2019).
- 9 Andreotti F, Crea F. Substandard life-saving drugs: a global concern. *Eur Heart J* 2005;**26**:858–60. doi:10.1093/eurheartj/ehi219
- 10 Gowri Sankar D, Kalyan Sumanth S, Pawar AK., *et al.* UV spectrophotometric determination of clopidogrel and repaglinide. *Asia J Chem* 2005;**17**.[http://www.asianjournalofchemistry.co.in/User/ViewFreeArticle.aspx?ArticleID=17\\_3\\_99](http://www.asianjournalofchemistry.co.in/User/ViewFreeArticle.aspx?ArticleID=17_3_99) (accessed 25 Sep 2019).
- 11 Issiaka CAMARA. Étude de la qualité des médicaments génériques DCI achetés par la Pharmacie Populaire du Mali dans le cadre des appels d'offres de 2002 à 2005.
- 12 Malenovic A, Medenica M, Ivanovic D. Monitoring of simvastatin impurities by HPLC with microemulsion eluents. *Chromatographia* 2006;**63**:S95–100. doi:<http://dx.doi.org/10.1365/s10337-006-0747-4>
- 13 Jankovics P, Németh T, Németh-Palotás J, *et al.* Amlodipine besilate screening in pharmaceutical preparations by CE. *Chromatographia* 2008;**68**:S43–8. doi:<http://dx.doi.org/10.1365/s10337-008-0620-8>
- 14 Ramacciotti E, Wahi R, Messmore HL, *et al.* Contaminated heparin preparations, severe adverse events and the contact system. *Clin Appl Thromb* 2008;**14**:489–91. doi:<http://dx.doi.org/10.1177/1076029608324291>
- 15 WHO. Contaminated heparin products recalled. *WHO Drug Inf* 2008;**22**:10.[http://www.who.int/medicines/publications/druginformation/issues/22\\_1\\_2008.pdf](http://www.who.int/medicines/publications/druginformation/issues/22_1_2008.pdf)
- 16 Thoithi G., Abuga K., Nguyo J. Drug Quality Control in Kenya: Observation in the Drug Analysis and Research Unit During the Period 2001-2005. *East Cent. African J. Pharm. Sci.* 2008;**74**–81.[https://www.researchgate.net/publication/272459027\\_Drug\\_Quality\\_Control\\_in\\_Kenya\\_Observation\\_in\\_the\\_Drug\\_Analysis\\_and\\_Research\\_Unit\\_During\\_the\\_Period\\_2001-2005](https://www.researchgate.net/publication/272459027_Drug_Quality_Control_in_Kenya_Observation_in_the_Drug_Analysis_and_Research_Unit_During_the_Period_2001-2005) (accessed 25 Sep 2019).
- 17 Melo E, Pereira M, Cunha R, *et al.* Heparin quality control in the Brazilian market: Implications in the cardiovascular surgery. *Brazilian J Cardiovasc Surg* 2008;**23**:169–74.[http://www.scielo.br/pdf/rbccv/v23n2/en\\_v23n2a04.pdf](http://www.scielo.br/pdf/rbccv/v23n2/en_v23n2a04.pdf)
- 18 Monneret C. Les héparines contaminées. *Ann Pharm Fr* 2008;**66**:212–5. doi:<http://dx.doi.org/10.1016/j.pharma.2008.07.004>
- 19 UK Government action on counterfeit medicines. *Pharm. J.* <https://www.pharmaceutical-journal.com/opinion/comment/uk-government-action-on-counterfeit-medicines/10008049.article?firstPass=false> (accessed 25 Sep 2019).
- 20 Zhang Z, Li B, Suwan J, *et al.* Analysis of pharmaceutical heparins and potential contaminants using <sup>1</sup>H-NMR and PAGE. *J Pharm Sci* 2009;**98**:4017–26. doi:<http://dx.doi.org/10.1002/jps.21729>
- 21 Yang Y, Gupta A, Carlin A, *et al.* Comparative stability of repackaged metoprolol tartrate tablets. *Elsevier* doi:<https://doi.org/10.1016/j.ijpharm.2009.10.040>

- 22 Yankus W. Counterfeit Drugs: Coming to a Pharmacy Near You with an Update for 2009. *Am. Counc. Sci. Heal.* 2009. [https://drive.google.com/file/d/1Y-6zRTH6GHabWIMnV15JbpTMMum61b\\_d/view](https://drive.google.com/file/d/1Y-6zRTH6GHabWIMnV15JbpTMMum61b_d/view) (accessed 3 Jun 2019).
- 23 Moffat AC, Assi S, Watt RA. Identifying Counterfeit Medicines Using near Infrared Spectroscopy. *J Near Infrared Spectrosc* 2010;**18**:1–15. doi:10.1255/jnirs.856
- 24 Quality of medicines stored together in multi-compartment compliance aids. *J Clin Pharm Ther* 2010;**35**:533–43. doi:<http://dx.doi.org/10.1111/j.1365-2710.2009.01129.x>
- 25 Sagita D. Raids uncover counterfeit drugs. 2009. <https://drive.google.com/file/d/14plcZWR6p6NYjMbIIszhONmmAT8oHFYV/view> (accessed 16 Dec 2020).
- 26 Alban S, Lühn S, Schiemann S, *et al.* Comparison of established and novel purity tests for the quality control of heparin by means of a set of 177 heparin samples. *Springer* doi:10.1007/s00216-010-4169-7
- 27 Beyer T, Matz M, Brinz D, *et al.* Composition of OSCS-contaminated heparin occurring in 2008 in batches on the German market. *Eur J Pharm Sci* 2010;**40**:297–304. doi:10.1016/j.ejps.2010.04.002
- 28 Exebio LEM, Rodríguez J, Sayritupac F. Los medicamentos falsificados en Perú. *Rev Panam Salud Pública* 2010;**27**:138–43. doi:10.1590/S1020-49892010000200008
- 29 Iranian Association of Pharmaceutical Scientists. S, Mohammadi Samani S, Yarmohammadi G, *et al.* *Post Marketing Surveillance on Propranolol and Atenolol Tablets Manufactured in Iran.* Iranian Association of Pharmaceutical Scientists 2010. [http://www.ijps.ir/article\\_2110.html](http://www.ijps.ir/article_2110.html) (accessed 12 Jun 2019).
- 30 Zhao N, Zidan A, Tawakkul M, *et al.* Tablet splitting: Product quality assessment of metoprolol succinate extended release tablets. *Int J Pharm* 2010;**401**:25–31. doi:<http://dx.doi.org/10.1016/j.ijpharm.2010.09.004>
- 31 Ramacciotti E, Clark M, Sadeghi N, *et al.* Contaminants in heparin: Review of the literature, molecular profiling, and clinical implications. *Clin Appl Thromb* 2011;**17**:126–35. doi:<http://dx.doi.org/10.1177/1076029610392214>
- 32 Bamigbola E A, Ibrahim M A, Attama A A, *et al.* In vitro-in vivo correlation of four commercial brands of aspirin tablets marketed in Nigeria. *African J Pharm Pharmacol* 2011;**5**:1648–54. doi:10.5897/AJPP10.179
- 33 Luhn S, Schiemann S, Alban S, *et al.* Simple fluorescence assay for quantification of OSCS in heparin. *Anal Bioanal Chem* 2011;**399**:673–80. doi:10.1007/s00216-010-3867-5
- 34 Bate R, Jin GZ, Mathur A. Unveiling the Mystery of Online Pharmacies: an Audit Study. 2012. [https://www.researchgate.net/publication/254072335\\_Unveiling\\_the\\_Mystery\\_of\\_Online\\_Pharmacies\\_an\\_Audit\\_Study](https://www.researchgate.net/publication/254072335_Unveiling_the_Mystery_of_Online_Pharmacies_an_Audit_Study) (accessed 25 Sep 2019).
- 35 Mason RP, Jacob R. Atorvastatin generics obtained from multiple sources worldwide contain a methylated impurity that reduces their hmg-coa reductase inhibitory effects. *J Clin Lipidol* 2013;**7**:287. doi:<http://dx.doi.org/10.1016/j.jacl.2013.03.096>
- 36 Ye H, Toby TK, Sommers CD, *et al.* Characterization of currently marketed heparin products: Key tests for LMWH quality assurance. *J Pharm Biomed Anal* 2013;**85**:99–107. doi:<http://dx.doi.org/10.1016/j.jpba.2013.06.033>
- 37 Pant T, Subedi KMRK. In vitro studies of amlodipine besylate tablet and comparison with foreign brand leader in Nepal. 2013. <https://ijpsr.com/bft-article/in-vitro-studies-of-amlodipine-besylate-tablet-and-comparison-with-foreign-brand-leader-in-nepal/> (accessed 16 Dec 2020).
- 38 Haywood A, Glass BD. Liquid dosage forms extemporaneously prepared from commercially available products - Considering new evidence on stability. *J Pharm Pharm Sci* 2013;**16**:441–55. <http://ejournals.library.ualberta.ca/index.php/JPPS/article/view/19411/15507>
- 39 Abuga KO, Amugune BK, Ndwigah SN, *et al.* Quality Performance of Drugs Analyzed in the Drug Analysis and Research Unit (DARU) during the Period 2006-

2010. *East Cent African J Pharm Sci* 2013;**16**.[https://profiles.uonbi.ac.ke/okibwage/files/full\\_paper.pdf](https://profiles.uonbi.ac.ke/okibwage/files/full_paper.pdf) (accessed 25 Sep 2019).
- 40 Arayne MS, Sultana N, Tabassum A. RP-LC simultaneous quantitation of co-administered drugs for (non-insulin dependent) diabetic mellitus induced dyslipidemia in active pharmaceutical ingredient, pharmaceutical formulations and human serum with UV-detector. *Clin Chim Acta* 2013;**425**:54–61. doi:10.1016/j.cca.2013.06.020
- 41 Johnston A, Holt DW. Substandard drugs: a potential crisis for public health. *Br J Clin Pharmacol* 2014;**78**:218–43. doi:10.1111/bcp.12298
- 42 Alghannam A, Evans S, Schifano F, *et al.* A systematic review of counterfeit and substandard medicines in field quality surveys. *Integr Pharm Res Pract* 2014;**3**:71. doi:10.2147/IPRP.S63690
- 43 ETantawy M., Bebawy L. Chromatographic determination of clopidogrel bisulfate; detection and quantification of counterfeit Plavix tablets. *Bull Fac Pharmacy, Cairo Univ* 2014;**52**:91–101. doi:<http://dx.doi.org/10.1016/j.bfopcu.2014.04.003>
- 44 Naveed S, Jawaid W. Degradation study of different brands of amlodipine using UV spectrophotometer. *J Sci Innov Res*[http://www.jsirjournal.com/Vol3\\_Issue4\\_04.pdf](http://www.jsirjournal.com/Vol3_Issue4_04.pdf) (accessed 26 Mar 2019).
- 45 El Karbane M, Ramli Y, Amood Al-Kamarany M, *et al.* Development and validation of HPLC dissolution assay of simvastatin tablets under normal and accelerated conditions. *J Chem Pharm Res* 2014;**6**:886–93.<http://jocpr.com/vol6-iss6-2014/JCPR-2014-6-6-886-893.pdf>
- 46 Abe T, Yanagihara Y, Uchino T, *et al.* Evaluation of the Pharmaceutical Characteristics of Various Enteric-Coated Aspirin Tablets under Different Storage Conditions. *Chem Pharm Bull* 2014;**62**:617–26. doi:10.1248/cpb.c13-00580
- 47 Bernard M, Akrouf W, Van Buu CT, *et al.* Liquid chromatography with tandem mass spectrometry for the simultaneous identification and quantification of cardiovascular drugs applied to the detection of substandard and falsified drugs. *J Sep Sci* 2015;**38**:562–70. doi:10.1002/jssc.201401301
- 48 Lekshmi S, Mohanta G., Farooq A, *et al.* Quality and Availability of Medicines in Public Health Facilities of Kerala, Indian State an Analysis. *Int J Adv Sci Eng Technol* 2014;**2**.[http://www.iraj.in/journal/journal\\_file/journal\\_pdf/6-87-142044869595-97.pdf](http://www.iraj.in/journal/journal_file/journal_pdf/6-87-142044869595-97.pdf) (accessed 25 Sep 2019).
- 49 Kumar R. Recent applications of analytical techniques for counterfeit drug analysis: A review. *Int J PharmTech Res* 2014;**6**:646–65.[http://sphinxssai.com/2014/PTVOL6/PT=31\(646-665\)AJ14.pdf](http://sphinxssai.com/2014/PTVOL6/PT=31(646-665)AJ14.pdf)
- 50 Drug Quality: Postmarket Sampling and Testing Results for Drugs (FY 2015) | FDA. US FDA. 2015.<https://www.fda.gov/media/103649/download> (accessed 25 Sep 2019).
- 51 Gyanwali P, Humagain BR, Aryal KK, *et al.* Surveillance of Quality of Medicines Available in the Nepalese Market: A Study from Kathmandu Valley. *J Nepal Health Res Counc* 2015;**13**:233–40.<http://ovidsp.ovid.com/ovidweb.cgi?T=JS&PAGE=reference&D=emed16&NEWS=N&AN=616144386>
- 52 Zaid AN, Ghanem M, Shweiki D, *et al.* In vitro and in vivo postmarketing surveillance of valsartan, alone or in combination with amlodipine or hydrochlorothiazide, among palestinian hypertensive patients. *Ther Clin Risk Manag* 2016;**12**:1425–32. doi:<http://dx.doi.org/10.2147/TCRM.S110727>
- 53 Surinder Singh. National Drug Survey - The Core Expert Committee. Natl. Inst. Biol. 2016.[http://nib.gov.in/Drug\\_Survey.html](http://nib.gov.in/Drug_Survey.html) (accessed 25 Sep 2019).
- 54 Hussain Z, Baqir S, Naqvi S, *et al.* Process validation of tablet containing Irbesartan 300mg and Hydrochlorothiazide 12.5mg. *Int J Sci Eng Res* 2016.
- 55 Drug Quality: Postmarket Sampling and Testing Results for Drugs (FY 2016) | FDA. US FDA. 2016.<https://www.fda.gov/media/103635/download> (accessed 25 Sep 2019).
- 56 Trippe ZA, Brendani B, Meier C. Identification of Substandard Medicines via Disproportionality Analysis of Individual Case Safety Reports. *Drug Saf* 2017;**40**:293–303. doi:<http://dx.doi.org/10.1007/s40264-016-0499-5>

- 57 Islam R. Investigations Of The Quality Medicines Distributed In Myanmar And Cambodia, Through Different Surveys. Grad. Sch. Med. Sci. Technol. Kanazawa Univ. [https://kanazawa-u.repo.nii.ac.jp/?action=repository\\_action\\_common\\_download&item\\_id=43361&item\\_no=1&attribute\\_id=31&file\\_no=1](https://kanazawa-u.repo.nii.ac.jp/?action=repository_action_common_download&item_id=43361&item_no=1&attribute_id=31&file_no=1) (accessed 9 Dec 2019).
- 58 Koczwara A, Dressman J. Poor-Quality and Counterfeit Drugs: A Systematic Assessment of Prevalence and Risks Based on Data Published From 2007 to 2016. *J Pharm Sci* 2017;**106**:2921–9. doi:10.1016/j.xphs.2017.05.018
- 59 Praveen Kumar G, Ravi Shankar A. A Study on Spurious and Not of Standard Quality Drugs in the State of Andhra Pradesh. *African J Pharm Pharmacol* Published Online First: 2018.<https://academicjournals.org/journal/AJPP/article-full-text-pdf/4EC3AD856268> (accessed 25 Sep 2019).
- 60 Shanley A. After Valsartan Recalls, Regulators Grapple with Nitrosamine Contamination in APIs. Published Online First: 2018.<http://www.pharmtech.com/after-valsartan-recalls-regulators-grapple-nitrosamine-contamination-apis> (accessed 27 Mar 2019).
- 61 Ukwueze SE, Uliah C. Comparison of UV spectrophotometry and HPLC methods for the determination of pharmaceutical equivalence of clopidogrel tablet brands marketed in Nigeria. *Eur J Pharm Med Res* 2018;**5**:126–30.<http://www.ejpmr.com/admin/download/article/MTUyNTA2Nzk2MC5wZGY=>
- 62 Machairas G, Panderi I, Geballa-Koukoula A, *et al.* Development and validation of a hydrophilic interaction liquid chromatography method for the quantitation of impurities in fixed-dose combination tablets containing rosuvastatin and metformin. *Talanta* 2018;**183**:131–41. doi:10.1016/j.talanta.2018.02.068
- 63 Rebiere H, Kermaidic A, Ghyselinck C, *et al.* Inorganic analysis of falsified medical products using X-ray fluorescence spectroscopy and chemometrics. *Talanta* 2019;**195**:490–6. doi:<http://dx.doi.org/10.1016/j.talanta.2018.11.051>
- 64 Parr M, Joseph J. NDMA impurity in valsartan and other pharmaceutical products: Analytical methods for the determination of N-nitrosamines. *J Pharm Biomed Anal* 2019;**164**:536–49. doi:<http://dx.doi.org/10.1016/j.jpba.2018.11.010>
- 65 Banzi R. Regulatory response to contaminated valsartan. *BMJ* 2018;**362**:k3855. doi:<http://dx.doi.org/10.1136/bmj.k3855>
- 66 WHO pharmaceuticals Newsletter No.5 2018. WHO Published Online First: 2018.<https://apps.who.int/iris/bitstream/handle/10665/275697/WPN-2018-05-eng.pdf?sequence=1&isAllowed=y> (accessed 25 Sep 2019).
- 67 Tsutsumi T, Akiyama H. Analysis of an impurity, N-nitrosodimethylamine, in valsartan drug substances and associated products using GC-MS. *Biol Pharm Bull* Published Online First: 2019.[https://www.jstage.jst.go.jp/article/bpb/advpub/0/advpub\\_b19-00006/\\_article-char/ja/](https://www.jstage.jst.go.jp/article/bpb/advpub/0/advpub_b19-00006/_article-char/ja/) (accessed 27 Mar 2019).
- 68 Gunasekaran PM, Chertow GM, Bhalla V, *et al.* Current status of angiotensin receptor blocker recalls. *Hypertension* 2019;**74**:1275–8. doi:<http://dx.doi.org/10.1161/HYPERTENSIONAHA.119.13955>
- 69 Zeng BS, Gu YR, Nguyen K, *et al.* Development of quantitative HPTLC-densitometry methods following a model process for transfer of TLC screening methods for pharmaceutical products containing moxifloxacin HCl, ofloxacin, amoxicillin trihydrate, acetylsalicylic acid + acetaminophen + caffeine. *J Liq Chromatogr Relat Technol* 2019;**42**:324–9. doi:10.1080/10826076.2019.1585609
- 70 Antignac M, Bara Diop I, Macquart de Terline D, *et al.* Falsified and substandard cardiovascular drugs in Africa: a need for continued monitoring strategies. *J. Glob. Health.* 2019;**9**:010302. doi:10.7189/jogh.09.020302
- 71 Tamargo J, Journal-Cardiovascular GR-EH, undefined 2020. Low quality of some generic cardiovascular medicinal products represents a matter for growing concern. *academic.oup.com*<https://academic.oup.com/ehjcvp/article-abstract/6/3/176/5566494>
- 72 Ashames A, Bhandare R, AlAbdin SZ, *et al.* Public perception toward e-commerce of medicines and comparative pharmaceutical quality assessment study of two different products of furosemide tablets from community and illicit online pharmacies. *J Pharm Bioallied Sci* 2019;**11**:284–91. doi:10.4103/jpbs.JPBS\_66\_19

- 73 Snodin D., Elder DP. Short commentary on NDMA (N-nitrosodimethylamine) contamination of valsartan products. *Regul Toxicol Pharmacol* 2019;**103**:325–9. doi:<http://dx.doi.org/10.1016/j.yrtph.2019.01.007>
- 74 Defibrotide falsifie et contamine identifie dans les regions de l’OMS de l’Europe, Mediterranee orientale et du Pacifique occidental. <https://www.who.int/fr/news/item/07-05-2020-medical-product-alert-n-5-2020> (accessed 16 Dec 2020).
- 75 Rojas-Cortés R. Substandard, falsified and unregistered medicines in Latin America, 2017-2018. *Rev Panam Salud Publica/Pan Am J Public Heal* 2020;**44**. doi:10.26633/RPSP.2020.125
- 76 Ballereau F, Prazuck T, Schrive I, *et al*. Stability of essential drugs in the field: Results of a study conducted over a two-year period in Burkina Faso. *Am J Trop Med Hyg* 1997;**57**:31–6. doi:10.4269/ajtmh.1997.57.31
