# Supplementary material for: The quality of medical products for cardiovascular diseases: a gap in global cardiac care
Source: PubMed Central journal article supplement (PMC8442059; doi:10.1136/bmjgh-2021-006523), 2021-09-14
Supplement: bmjgh-2021-006523supp017.pdf [file bmjgh-2021-006523supp017.pdf]

**Supplementary file 17. Other articles discussing cardiovascular medical devices quality**

| Title                                                                                                                                                      | First author  | Year |
|------------------------------------------------------------------------------------------------------------------------------------------------------------|---------------|------|
| Pseudomalfuction of pacemaker due to a defective electrocardiograph [1]                                                                                    | N, Ali        | 1983 |
| Defective intravenous cannula [2]                                                                                                                          | MP, Sinden    | 1995 |
| Failure Rates of Leads, Pulse Generators, and Programmers Have Not Diminished Over the Last 20 Years: Formal Monitoring of Performance is Still Needed [3] | DT, Kawanishs | 1996 |
| Aspects généraux et réglementaires de la materiovigilance des stimulateurs et des défibrillateurs cardiaques [4]                                           | L, Fauchier   | 2004 |
| Heart-Valve Records Falsified [5]                                                                                                                          | M, Shiu       | 1991 |

- 1 Ali N, Bhatia S, N. A. Pseudomalfuction of pacemaker due to a defective electrocardiograph. *Am J Cardiol* 1984;**53**:373–4.<http://ovidsp.ovid.com/ovidweb.cgi?T=JS&PAGE=reference&D=emed3&NEWS=N&AN=14215406>
- 2 Sinden MP, Jayamaha JE, M.P. S. Defective intravenous cannula. *Anaesthesia* 1995;**50**:829–30.<http://ovidsp.ovid.com/ovidweb.cgi?T=JS&PAGE=reference&D=emed5&NEWS=N&AN=125120386>
- 3 Kawanishi DT, Song S, Furman S, *et al.* Failure Rates of Leads, Pulse Generators, and Programmers Have Not Diminished Over the Last 20 Years: Formal Monitoring of Performance is Still Needed. *Pacing Clin Electrophysiol* 1996;**19**:1819–23. doi:10.1111/j.1540-8159.1996.tb03232.x
- 4 Fauchier L, de Bouët du Portal H, Giraudeau C, *et al.* Aspects généraux et réglementaires de la matériovigilance des stimulateurs et des défibrillateurs cardiaques. *Ann Cardiol Angeiol (Paris)* 2005;**54**:38–43. doi:10.1016/j.ancard.2004.11.004
- 5 Shiu M, Dyer C. Heart-Valve Records Falsified. *Br. Med. J.* 1991;**303**:1222. doi:10.1136/bmj.304.6819.118-b
